# Supplementary material for: Epidemiology and transmission dynamics of multidrug-resistant organisms in nursing homes within the United States
Source: Springer Nature journal article supplement (doi:10.1038/s41467-025-57566-3), 2025-03-13
Supplement: MOESM1 [file 41467_2025_57566_MOESM1_ESM.pdf]

**EPIDEMIOLOGY AND TRANSMISSION DYNAMICS OF MULTIDRUG-RESISTANT ORGANISMS IN NURSING HOMES  
WITHIN THE UNITED STATES: SUPPLEMENTARY INFORMATION**

**SUPPLEMENTARY TABLES**

**Supplementary Table 1.** Significant characteristics of Veterans Affairs nursing home participants, by colonization status at baseline.

|                                                      | <b>Overall<br/>(n = 188)<sup>a</sup></b> | <b>Colonized at Baseline<br/>(n = 68)</b> | <b>Not Colonized at Baseline<br/>(n = 120)</b> | <b>P-value</b> |
|------------------------------------------------------|------------------------------------------|-------------------------------------------|------------------------------------------------|----------------|
| Recent Antibiotic Use                                | 129 (68.6%)                              | 57 (83.8%)                                | 72 (60.0%)                                     | 7.2e-4         |
| Wounds at Baseline                                   | 64 (34.0%)                               | 30 (44.1%)                                | 34 (28.3%)                                     | 0.028          |
| Length of Preadmission<br>Hospitalization, days      |                                          |                                           |                                                | 0.002          |
| 0–3 days                                             | 32 (17.0%)                               | 5 (7.4%)                                  | 27 (22.5%)                                     |                |
| 4–7 days                                             | 51 (27.1%)                               | 16 (23.5%)                                | 35 (29.2%)                                     |                |
| 8–14 days                                            | 59 (31.4%)                               | 21 (30.9%)                                | 38 (31.7%)                                     |                |
| >14 days                                             | 46 (24.5%)                               | 26 (38.2%)                                | 20 (16.7%)                                     |                |
| Recent hospitalization length, days,<br>median (IQR) | 8.5 (5-14)                               | 13 (7-18)                                 | 7 (4-12)                                       | 1.3e-4         |
|                                                      | <b>Facility A<br/>(n=94)</b>             | <b>Colonized at Baseline<br/>(n=33)</b>   | <b>Not Colonized at Baseline<br/>(n=61)</b>    | <b>P-value</b> |
| Recent Antibiotic Use                                | 73 (77.7%)                               | 31 (93.9%)                                | 42 (68.9%)                                     | 0.005          |
| Recent hospitalization length, days,<br>median (IQR) | 10.0 (4.0-15.0)                          | 13.0 (7.0-18.0)                           | 8.0 (2.0-13.0)                                 | 0.030          |
| Katz (ADL) Score <sup>b</sup> , median (IQR)         | 3.6 (2.3)                                | 4.5 (2.0)                                 | 3.1 (2.3)                                      | 0.005          |
| Functional dependence <sup>c</sup> at baseline       |                                          |                                           |                                                |                |
| Dependence in Transferring                           | 70 (74.5%)                               | 29 (87.9%)                                | 41 (67.2%)                                     | 0.046          |
| Dependence in Bathing                                | 67 (71.3%)                               | 29 (87.9%)                                | 38 (62.3%)                                     | 0.009          |
| Dependence in Toileting                              | 64 (68.1%)                               | 27 (81.8%)                                | 37 (60.7%)                                     | 0.036          |
| Dependence in Dressing                               | 60 (63.8%)                               | 26 (78.8%)                                | 34 (55.7%)                                     | 0.026          |
| Dependence in Continence                             | 45 (47.9%)                               | 22 (66.7%)                                | 23 (37.7%)                                     | 0.007          |
|                                                      | <b>Facility B<br/>(n=55)</b>             | <b>Colonized at Baseline<br/>(n=24)</b>   | <b>Not Colonized at Baseline<br/>(n=31)</b>    | <b>P-value</b> |
| Recent Antibiotic Use                                | 32 (58.2%)                               | 19 (79.2%)                                | 13 (41.9%)                                     | 0.006          |
| Recent hospitalization length, days,<br>median (IQR) | 10.0 (6.0-14.0)                          | 13.0 (7.5-19.5)                           | 8.0 (5.0-12.0)                                 | 0.020          |
|                                                      | <b>Facility C<br/>(n=39)</b>             | <b>Colonized at Baseline<br/>(n=11)</b>   | <b>Not Colonized at Baseline<br/>(n=28)</b>    | <b>P-value</b> |
| Length of Preadmission<br>Hospitalization            |                                          |                                           |                                                | 0.028          |
| 0–3 days                                             | 10 (25.6%)                               | 2 (18.2%)                                 | 8 (28.6%)                                      |                |
| 4–7 days                                             | 14 (35.9%)                               | 3 (27.3%)                                 | 11 (39.3%)                                     |                |
| 8–14 days                                            | 6 (15.4%)                                | 0 (0.0%)                                  | 6 (21.4%)                                      |                |
| >14 days                                             | 9 (23.1%)                                | 6 (54.5%)                                 | 3 (10.7%)                                      |                |

Data are number of participants (%), unless otherwise specified. Two-sided p-values are based on ANOVA for continuous variables and Pearson's chi-square or Fisher's exact test for categorical variables. Two-sided p-value for "Recent hospitalization length," is based on Kruskal-Wallis test.

Abbreviations: ADL, activities of daily living; IQR, interquartile range; PICC, peripherally inserted central catheter.

<sup>a</sup>Due to data missing on admission. Total n=188 participants due to missing data on nine participants: race (n=7 missing) and hospital length of stay (n=2 missing).

<sup>b</sup>Overall Katz score ranges from 0-6, with 0 being independent and 6 being dependent in all six ADLs assessed.

<sup>c</sup>Dependence in function are defined as (1) transferring: needs help in moving from bed to chair or requires a complete transfer; (2) bathing: needs help with bathing more than one part of the body, getting in or out of the tub or shower, or requires total bathing assistance; (3) toileting: needs help transferring to the toilet, cleaning self or uses bedpan or commode; (4) dressing: needs help dressing self or needs to be completely dressed; (5) continence: is partially or totally incontinent of bowel or bladder.

**Supplementary Table 2.** Significant characteristics of Veterans Affairs nursing home participants, by acquisition of new MDROs.

|                                                | <b>Overall<br/>(n = 173)<sup>a</sup></b> | <b>New MDRO Acquired<br/>(n = 71)</b> | <b>New MDRO Not Acquired<br/>(n = 102)</b> | <b>P-value</b> |
|------------------------------------------------|------------------------------------------|---------------------------------------|--------------------------------------------|----------------|
| Uses PICC Line                                 | 35 (20.2%)                               | 19 (26.8%)                            | 16 (15.7%)                                 | 0.074          |
| Length of stay in study, days,<br>median (IQR) | 28 (15-42)                               | 34 (21-54)                            | 25.5 (12-36)                               | 0.002          |
|                                                | <b>Facility A<br/>(n=88)</b>             | <b>New MDRO Acquired<br/>(n=33)</b>   | <b>New MDRO Not Acquired<br/>(n=55)</b>    | <b>P-value</b> |
| Uses PICC Line                                 | 20 (22.7%)                               | 12 (36.4%)                            | 8 (14.5%)                                  | 0.018          |
| Length of stay in study, days,<br>median (IQR) | 29.0 (15.5-40.0)                         | 33.0 (22.0-45.0)                      | 27.0 (13.0-36.0)                           | 0.020          |
|                                                | <b>Facility B<br/>(n=51)</b>             | <b>New MDRO Acquired<br/>(n=23)</b>   | <b>New MDRO Not Acquired<br/>(n=28)</b>    | <b>P-value</b> |
| Length of stay in study, days,<br>median (IQR) | 35.0 (20.0-60.0)                         | 37.0 (22.0-77.0)                      | 31.5 (17.5-39.0)                           | 0.054          |
|                                                | <b>Facility C<br/>(n=34)</b>             | <b>New MDRO Acquired<br/>(n=15)</b>   | <b>New MDRO Not Acquired<br/>(n=19)</b>    | <b>P-value</b> |
| No significant variables                       |                                          |                                       |                                            |                |

Data are number of participants (%), unless otherwise specified. Two-sided p-values are based on ANOVA for continuous variables and Pearson's chi-square or Fisher's exact test for categorical variables. Two-sided p-value for "Recent hospitalization length," is based on Kruskal-Wallis test.

Abbreviations: IQR, interquartile range; PICC, peripherally inserted central catheter.

<sup>a</sup>Due to data missing on admission. Total n=173 participants due to missing data on 8 participants: race (n=7 missing) and hospital length of stay (n=1 missing)-- and excluding 16 participants (12 discharged after enrollment visit and 4 colonized with all MDROs at baseline).

**Supplementary Table 3.** Categorization of participants for sequencing selection, based on MDRO colonization, room contamination, new acquisition, and transmission.

| Category | Participant colonized on ≥1 in-room visit | Participant room contaminated on ≥1 in-room visit | Participant with contamination at any interactive visit | Participant with transmission during an interactive visit | Participant with new acquisition during follow-up | VRE              |              | MRSA             |              |
|----------|-------------------------------------------|---------------------------------------------------|---------------------------------------------------------|-----------------------------------------------------------|---------------------------------------------------|------------------|--------------|------------------|--------------|
|          |                                           |                                                   |                                                         |                                                           |                                                   | No. Participants | No. Isolates | No. Participants | No. Isolates |
| 1        | No                                        | No                                                | No                                                      | No                                                        | No                                                | 65               | 0            | 130              | 0            |
| 2        | Yes                                       | No                                                | No                                                      | No                                                        | No                                                | 9                | 10           | 3                | 3            |
| 3        | Yes                                       | Yes                                               | No                                                      | No                                                        | --                                                | 46               | 398          | 12               | 170          |
| 3b       | Yes                                       | Yes                                               | No                                                      | No                                                        | Yes                                               | 21               | 105          | 6                | 65           |
| 4        | Yes                                       | Yes                                               | Yes                                                     | --                                                        | --                                                | 34               | 622          | 12               | 227          |
| 4b       | Yes                                       | Yes                                               | Yes                                                     | Yes                                                       | --                                                | 22               | 450          | 8                | 144          |
| 4c       | Yes                                       | Yes                                               | Yes                                                     | Yes                                                       | Yes                                               | 6                | 81           | 2                | 14           |
| 5        | No                                        | Yes                                               | No                                                      | No                                                        | No                                                | 32               | 54           | 23               | 29           |
| 6        | No                                        | No                                                | Yes                                                     | --                                                        | No                                                | 4                | 7            | 11               | 12           |
| 7        | Yes                                       | No                                                | Yes                                                     | --                                                        | --                                                | 1                | 2            | 3                | 8            |
| 8        | No                                        | Yes                                               | Yes                                                     | --                                                        | No                                                | 6                | 23           | 3                | 9            |
| Total    |                                           |                                                   |                                                         |                                                           |                                                   | 197              | 1116         | 197              | 458          |

Abbreviations: MDRO, multidrug-resistant organism; VRE, vancomycin-resistant enterococci; MRSA, methicillin-resistant *Staphylococcus aureus*.

**Supplementary Table 4.** Veterans Affairs nursing home characteristics and infection control policies.

| VA Characteristics (as of Dec 2022)                                                                                                                                                           | VA Facility                                                                               |                                                                               |                                                                                                                                                                     |
|-----------------------------------------------------------------------------------------------------------------------------------------------------------------------------------------------|-------------------------------------------------------------------------------------------|-------------------------------------------------------------------------------|---------------------------------------------------------------------------------------------------------------------------------------------------------------------|
|                                                                                                                                                                                               | A                                                                                         | B                                                                             | C                                                                                                                                                                   |
| <i>No. Inpatient Beds</i>                                                                                                                                                                     | 106                                                                                       | 646                                                                           | 432                                                                                                                                                                 |
| <i>Skilled Nursing Beds</i>                                                                                                                                                                   | 46                                                                                        | 174                                                                           | 115                                                                                                                                                                 |
| <b>Infection Control (IC) Program &amp; Infrastructure</b>                                                                                                                                    |                                                                                           |                                                                               |                                                                                                                                                                     |
| <i>FTE dedicated to IC activities</i>                                                                                                                                                         | 3.5                                                                                       | 5                                                                             | 3                                                                                                                                                                   |
| <i>FTE dedicated to antimicrobial stewardship</i>                                                                                                                                             | 1.5                                                                                       | 2.5                                                                           | 1.3                                                                                                                                                                 |
| <i>Does your facility have a specified person (e.g., staff, consultant) who is responsible for coordinating the IC program?</i>                                                               | Yes                                                                                       | Yes                                                                           | Yes                                                                                                                                                                 |
| <i>What level of professional training does he or she have?</i>                                                                                                                               | Registered Nurse (RN)                                                                     | Physician                                                                     | Physician                                                                                                                                                           |
| <i>How many years of IC experience does this person have at this facility?</i>                                                                                                                | ≥1 - < 3 years                                                                            | ≥10 years                                                                     | ≥10 years                                                                                                                                                           |
| <i>How many years of IC experience overall does this person have?</i>                                                                                                                         | ≥1 - < 3 years                                                                            | ≥10 years                                                                     | ≥10 years                                                                                                                                                           |
| <i>Has this person received training in IC?</i>                                                                                                                                               | No                                                                                        | Yes                                                                           | Yes                                                                                                                                                                 |
| <i>Does your facility have a process for reviewing infection surveillance data and infection prevention activities (e.g., presentation at QA committee)?</i>                                  | Yes                                                                                       | Yes                                                                           | Yes                                                                                                                                                                 |
| <i>Does your facility have written infection control policies and procedures available and based on evidence-based guidelines, regulations, or standards?</i>                                 | Yes                                                                                       | Yes                                                                           | Yes                                                                                                                                                                 |
| <i>Does your facility have a process for making policy changes at a local level?</i>                                                                                                          | Yes                                                                                       | Yes                                                                           | Yes                                                                                                                                                                 |
| <i>Does your facility have an environmental cleaning policy implemented facility wide?</i>                                                                                                    | Yes                                                                                       | Yes                                                                           | Yes                                                                                                                                                                 |
| <i>Does your facility have an environmental cleaning policy specific within each department?</i>                                                                                              | Yes                                                                                       | Yes                                                                           | No                                                                                                                                                                  |
| <i>Who provides IC-related training to the staff at your facility?</i>                                                                                                                        | Infection control nurse and MDRO coordinator.                                             | Infection control nurse, MDRO coordinator, and antimicrobial stewardship lead | Infection control nurse, MDRO coordinator, antimicrobial stewardship lead, and nursing education department                                                         |
| <b>MDRO Surveillance and Disease Reporting</b>                                                                                                                                                |                                                                                           |                                                                               |                                                                                                                                                                     |
| <i>Does your facility have written intake procedures to identify MDRO-colonized or infected persons at the time of NH admission?</i>                                                          | Yes                                                                                       | Yes                                                                           | Yes                                                                                                                                                                 |
| <i>Does your facility have a system in place in your NH for notification of IC coordinator when an antibiotic-resistant organism or C. difficile are reported by the clinical laboratory?</i> | No, we don't have an active process but the MDRO coordinator can go in and manually look. | Yes, use both Theradock and through Vista and CPRS                            | Yes, the lab contacts the NH so patients can be isolated. IC uses data extraction tools, electronic reporting via corporate data warehouse to create daily reports. |
| <i>Does your facility have a written surveillance plan outlining the activities for monitoring/tracking infections occurring in residents of the NH?</i>                                      | Yes                                                                                       | Yes                                                                           | Yes                                                                                                                                                                 |
| <i>Does your facility have a system to follow-up on clinical information (e.g., laboratory, procedure results and</i>                                                                         | Yes                                                                                       | Yes                                                                           | Yes                                                                                                                                                                 |

|                                                                                                                                                                                                                               |                                                                                                                                                                                                                                                                           |                                                                                                                 |                                                                                                                                           |
|-------------------------------------------------------------------------------------------------------------------------------------------------------------------------------------------------------------------------------|---------------------------------------------------------------------------------------------------------------------------------------------------------------------------------------------------------------------------------------------------------------------------|-----------------------------------------------------------------------------------------------------------------|-------------------------------------------------------------------------------------------------------------------------------------------|
| <i>diagnoses), when residents are transferred to acute care hospitals for management of suspected infections, including sepsis?</i>                                                                                           |                                                                                                                                                                                                                                                                           |                                                                                                                 |                                                                                                                                           |
| <i>We track NH's current MRSA infection rates</i>                                                                                                                                                                             | Yes                                                                                                                                                                                                                                                                       | Yes                                                                                                             | Yes                                                                                                                                       |
| <i>We track NH's current Hand hygiene rates</i>                                                                                                                                                                               | Yes                                                                                                                                                                                                                                                                       | Yes                                                                                                             | Yes                                                                                                                                       |
| <i>We track NH's current gown and glove use rates</i>                                                                                                                                                                         | No                                                                                                                                                                                                                                                                        | Yes                                                                                                             | No                                                                                                                                        |
| <b>Hand Hygiene (HH)</b>                                                                                                                                                                                                      |                                                                                                                                                                                                                                                                           |                                                                                                                 |                                                                                                                                           |
| <i>Do your NH's hand hygiene policies promote preferential use of alcohol-based hand rub (ABHR) over soap and water in most clinical situations, except in certain cases (e.g., C. difficile infections, norovirus, etc)?</i> | Yes                                                                                                                                                                                                                                                                       | Yes                                                                                                             | Yes                                                                                                                                       |
| <i>Do all NH personnel receive training and competency validation on HH at the time of employment?</i>                                                                                                                        | Yes                                                                                                                                                                                                                                                                       | Yes                                                                                                             | Yes                                                                                                                                       |
| <i>Does your NH routinely audit (monitor and document) adherence to HH?</i>                                                                                                                                                   | Yes, patient safety performs auditing                                                                                                                                                                                                                                     | Yes, HH monitors that report back to personnel and management                                                   | Yes, unit staff do secret evaluation and that data is reported to the Joint Commission Tracers with AMP® program                          |
| <i>Does your NH provide feedback to personnel regarding their HH performance?</i>                                                                                                                                             | Yes, data presented to IC committee and other committees which is communicated to staff to a degree                                                                                                                                                                       | Yes, it is reported to management and shared at staff meetings. Repeat offenders are given education as needed. | Yes, some corrections provided in real-time                                                                                               |
| <i>Are supplies necessary for adherence to HH (e.g., soap, water, paper towels, ABHR) readily accessible in resident care areas (i.e., nursing units, resident rooms, therapy rooms)?</i>                                     | Yes                                                                                                                                                                                                                                                                       | Yes                                                                                                             | Yes                                                                                                                                       |
| <b>Personal Protective Equipment (PPE)</b>                                                                                                                                                                                    |                                                                                                                                                                                                                                                                           |                                                                                                                 |                                                                                                                                           |
| <i>Does your facility perform job-specific training and competency validation for personnel on proper use of PPE at the time of employment?</i>                                                                               | Yes, there is verbal training for new employees (especially nurses, CNAs, etc.). Specific steps are now taken for COVID-19, which includes central education for a trainee. There is new employee training for 2 days for all employees, but new physicians often mis it. | Yes, during general orientation done by the MDRO coordinator.                                                   | Yes, through nursing education and orientation                                                                                            |
| <i>Does your facility perform job-specific training and competency validation for personnel on proper use of PPE annually?</i>                                                                                                | Yes, there are patient safety fairs that are more virtual/remote due to COVID-19.                                                                                                                                                                                         | Yes, there is an annual TMS module and facility-wide PPE training/review                                        | Yes                                                                                                                                       |
| <i>Does your facility perform routine audits (monitors and documents) of adherence to PPE use (e.g., adherence with indicated, donning/doffing)?</i>                                                                          | Yes, although only on the inpatient side. There is not one for NHs.                                                                                                                                                                                                       | Yes, our program allows us to specify job area, discovered chaplains that are bad at PPE.                       | Yes, IC does informal rounds, HH and PPE are also observed. Fingernail checks are done and quality managers do environment of care rounds |
| <i>Does your facility provide feedback to personnel regarding their PPE use?</i>                                                                                                                                              | Yes, the JIT feedback is done by the MDRO coordinator.                                                                                                                                                                                                                    | Yes, discussed within management then to specific employees with routine feedback                               | Yes, IC provides feedback during informal rounds                                                                                          |
| <i>Does your facility have supplies necessary for adherence to proper PPE use (e.g., gloves, gowns, masks) readily accessible in resident care areas (i.e., nursing units, therapy rooms)?</i>                                | Yes. But the facility is limited in where they can store PPEs. The MDRO coordinator wants to create more PPE stations, since they are currently spread far apart.                                                                                                         | Yes                                                                                                             | Yes                                                                                                                                       |
| <b>Environmental Cleaning &amp; Disinfection</b>                                                                                                                                                                              |                                                                                                                                                                                                                                                                           |                                                                                                                 |                                                                                                                                           |

|                                                                                                                                                                                                                                                                                                                                                                                          |                                                                                                                                                                                  |                                                                                                             |                                                                                                                                                                                                       |
|------------------------------------------------------------------------------------------------------------------------------------------------------------------------------------------------------------------------------------------------------------------------------------------------------------------------------------------------------------------------------------------|----------------------------------------------------------------------------------------------------------------------------------------------------------------------------------|-------------------------------------------------------------------------------------------------------------|-------------------------------------------------------------------------------------------------------------------------------------------------------------------------------------------------------|
| <i>Does your facility have written cleaning/disinfection policies, which include routine and high-touch surface cleaning, and terminal cleaning and disinfection, within the following areas:<br/>NH resident rooms, NH resident rooms on contact precautions, Common areas within the NH, therapy gyms, Dialysis, Radiology, Radiation-Onc, Infusion clinic, and Outpatient Clinic?</i> | Yes to all                                                                                                                                                                       | Yes to all                                                                                                  | Yes to all                                                                                                                                                                                            |
| <i>Does your facility have cleaning/disinfection policies that include handling of equipment shared among residents (e.g., blood pressure cuffs, rehab therapy equipment, etc.)?</i>                                                                                                                                                                                                     | Yes, this facility has SOPs which are supposed to be done between patients by staff.                                                                                             | Yes, there is a role-playing video in the training and reusable equipment disinfection is reviewed.         | Yes                                                                                                                                                                                                   |
| <i>Does your facility perform job-specific training and competency validation for personnel on cleaning and disinfection procedures at the time of employment?</i>                                                                                                                                                                                                                       | Yes                                                                                                                                                                              | Yes                                                                                                         | Yes, RME coordinator does rounds and observations with feedback                                                                                                                                       |
| <i>Does your facility perform job-specific training and competency validation for personnel on cleaning and disinfection procedures annually?</i>                                                                                                                                                                                                                                        | Yes                                                                                                                                                                              | Yes                                                                                                         | Yes                                                                                                                                                                                                   |
| <i>Does your facility routinely audit (monitor and document) the quality of cleaning and disinfection procedures?</i>                                                                                                                                                                                                                                                                    | Yes, vericlean is used in patient rooms and the MDRO coordinator checks to see if they are done in the NH. Infection control gets a report of the facilities management results. | Yes, monitor cleaning of patient beds (UV marker), HH monitors. EMS has own procedures as well              | Yes, RME coordinator performs audits with shared equipment while EMS staff does ATP monitoring on a routine basis. UV light is also used following terminal disinfection of patients with precautions |
| <i>Does your facility provide feedback to personnel regarding the quality of cleaning and disinfection procedures?</i>                                                                                                                                                                                                                                                                   | Yes                                                                                                                                                                              | Yes, monthly EMS meeting attended by an IP team member                                                      | Yes                                                                                                                                                                                                   |
| <i>Does your facility provide necessary supplies appropriate for cleaning and disinfection procedures (e.g., EPA-registered, including products labeled as effective against C. difficile and Norovirus)?</i>                                                                                                                                                                            | Yes                                                                                                                                                                              | Yes                                                                                                         | Yes                                                                                                                                                                                                   |
| <i>Is there a process for designing clean/ready-for-use equipment?</i>                                                                                                                                                                                                                                                                                                                   | Yes, this facility uses different bag colors to indicate clean versus dirty. There are also tags on wheelchairs.                                                                 | Yes, ready to use sheets, markers on the beds, IV poles with plastic signage, and clean/dirty utility rooms | Yes, clean supply rooms and make sure equipment is well-labeled                                                                                                                                       |
| <i>Who performs cleaning and how often is it performed in...</i>                                                                                                                                                                                                                                                                                                                         |                                                                                                                                                                                  |                                                                                                             |                                                                                                                                                                                                       |
| <i>Common areas within the NH (dining room, recreation area, or family rooms)</i>                                                                                                                                                                                                                                                                                                        | Housekeeping performs after each meal, and they mop the whole area during the afternoon and around midnight.                                                                     | EMS, daily                                                                                                  | EMS staff daily or more if needed                                                                                                                                                                     |
| <i>Therapy gyms</i>                                                                                                                                                                                                                                                                                                                                                                      | Staff cleans between each patient and housekeeping cleans in the evenings.                                                                                                       | EMS, at least daily                                                                                         | EMS staff daily or more if needed                                                                                                                                                                     |
| <i>Dialysis</i>                                                                                                                                                                                                                                                                                                                                                                          | Staff cleans between patients and housekeeping cleans in the evenings.<br>*for MDRO positive/precaution patients, housekeeping performs cleaning after.                          | EMS, at least daily                                                                                         | EMS staff daily or more if needed                                                                                                                                                                     |
| <i>Radiology</i>                                                                                                                                                                                                                                                                                                                                                                         | Staff cleans between patients and housekeeping cleans in the evenings.<br>*for MDRO positive/precaution patients, housekeeping performs cleaning after.                          | EMS, at least daily                                                                                         | EMS staff daily or more if needed                                                                                                                                                                     |
| <i>Radiation</i>                                                                                                                                                                                                                                                                                                                                                                         | Staff cleans between patients and housekeeping cleans in the evenings.                                                                                                           | EMS, at least daily                                                                                         | EMS staff daily or more if needed                                                                                                                                                                     |

|                                              |                                                                                                                                                         |                     |                                   |
|----------------------------------------------|---------------------------------------------------------------------------------------------------------------------------------------------------------|---------------------|-----------------------------------|
|                                              | *for MDRO positive/precaution patients, housekeeping performs cleaning after.                                                                           |                     |                                   |
| <i>Infusion Clinic</i>                       | Staff cleans between patients and housekeeping cleans in the evenings.<br>*for MDRO positive/precaution patients, housekeeping performs cleaning after. | EMS, at least daily | EMS staff daily or more if needed |
| <i>Outpatient clinics (e.g., eye clinic)</i> | Weekly cleaning by housekeeping in general. Staff does clean in between patients. The dental office gets cleaned daily.                                 | EMS, at least daily | EMS staff daily or more if needed |

Data collected via one-hour interviews with each facility's infection prevention and control representative.

Abbreviations: ATP, adenosine triphosphate; CPRS, computerized patient record system; EMS, environmental management services; FTE, full-time equivalent; HH, hand hygiene; IC, infection control; IV, intravenous; JC, joint commission; MDRO, multidrug-resistant organism; NH, nursing home; PPE, personal protective equipment; QA, quality assurance; RME, reliability maintenance engineering; UV, ultraviolet.



**Supplementary Table 5.** Number of swabs positive out of swabs collected during in-room visits.

|                                        | No. Swabs Positive / No. Swabs Collected (%) |                   |                   |                 | P-value |         |         |
|----------------------------------------|----------------------------------------------|-------------------|-------------------|-----------------|---------|---------|---------|
| All MDROs                              | All Facilities                               | Facility A        | Facility B        | Facility C      | A vs. B | A vs. C | B vs. C |
| Nares                                  | 90/757 (11.9%)                               | 29/392 (7.4%)     | 42/232 (18.1%)    | 19/133 (14.3%)  |         |         |         |
| Hand                                   | 151/757 (19.9%)                              | 68/392 (17.3%)    | 55/232 (23.7%)    | 28/133 (21.1%)  |         |         |         |
| Groin                                  | 241/744 (32.4%)                              | 116/391 (29.7%)   | 90/227 (39.6%)    | 35/126 (27.8%)  |         |         |         |
| Any Participant Body site <sup>a</sup> | 482/2,258 (21.3%)                            | 213/1,175 (18.1%) | 187/691 (27.1%)   | 82/392 (20.9%)  | 0.04    | 0.592   | 0.342   |
| Bed control                            | 121/757 (16.0%)                              | 50/393 (12.7%)    | 49/232 (21.1%)    | 22/132 (16.7%)  |         |         |         |
| Call button                            | 96/758 (12.7%)                               | 45/393 (11.5%)    | 37/232 (15.9%)    | 14/133 (10.5%)  |         |         |         |
| Table top                              | 126/756 (16.7%)                              | 47/393 (12.0%)    | 61/230 (26.5%)    | 18/133 (13.5%)  |         |         |         |
| TV remote/buttons                      | 122/758 (16.1%)                              | 54/393 (13.7%)    | 48/232 (20.7%)    | 20/133 (15.0%)  |         |         |         |
| Privacy curtain                        | 133/744 (17.9%)                              | 43/384 (11.2%)    | 76/232 (32.8%)    | 14/128 (10.9%)  |         |         |         |
| Bedrail                                | 136/758 (17.9%)                              | 55/393 (14.0%)    | 63/232 (27.2%)    | 18/133 (13.5%)  |         |         |         |
| Toilet seat                            | 151/754 (20.0%)                              | 74/392 (18.9%)    | 61/232 (26.3%)    | 16/130 (12.3%)  |         |         |         |
| Any Environmental site <sup>b</sup>    | 885/5,285 (16.7%)                            | 368/2,741 (13.4%) | 395/1,622 (24.4%) | 122/922 (13.2%) | 0.002   | 0.958   | 0.024   |
| <b>MRSA</b>                            |                                              |                   |                   |                 |         |         |         |
| Nares                                  | 48/757 (6.3%)                                | 16/392 (4.1%)     | 20/232 (8.6%)     | 12/133 (9.0%)   |         |         |         |
| Hand                                   | 49/757 (6.5%)                                | 17/392 (4.3%)     | 20/232 (8.6%)     | 12/133 (9.0%)   |         |         |         |
| Groin                                  | 26/744 (3.5%)                                | 6/391 (1.5%)      | 13/227 (5.7%)     | 7/126 (5.6%)    |         |         |         |
| Any Participant Body site <sup>a</sup> | 123/2,258 (5.4%)                             | 39/1,175 (3.3%)   | 53/691 (7.7%)     | 31/392 (7.9%)   | 0.059   | 0.126   | 0.954   |
| Bed control                            | 46/757 (6.1%)                                | 14/393 (3.6%)     | 23/232 (9.9%)     | 9/132 (6.8%)    |         |         |         |
| Call button                            | 37/758 (4.9%)                                | 11/393 (2.8%)     | 16/232 (6.9%)     | 10/133 (7.5%)   |         |         |         |
| Table top                              | 43/756 (5.7%)                                | 12/393 (3.1%)     | 21/230 (9.1%)     | 10/133 (7.5%)   |         |         |         |
| TV remote/buttons                      | 43/758 (5.7%)                                | 15/393 (3.8%)     | 17/232 (7.3%)     | 11/133 (8.3%)   |         |         |         |
| Privacy curtain                        | 29/744 (3.9%)                                | 8/384 (2.1%)      | 15/232 (6.5%)     | 6/128 (4.7%)    |         |         |         |
| Bedrail                                | 40/758 (5.3%)                                | 13/393 (3.3%)     | 18/232 (7.8%)     | 9/133 (6.8%)    |         |         |         |
| Toilet seat                            | 27/754 (3.6%)                                | 7/392 (1.8%)      | 14/232 (6.0%)     | 6/130 (4.6%)    |         |         |         |
| Any Environmental site <sup>b</sup>    | 265/5,285 (5.0%)                             | 80/2,741 (2.9%)   | 124/1,622 (7.6%)  | 61/922 (6.6%)   | 0.035   | 0.133   | 0.777   |
| <b>VRE</b>                             |                                              |                   |                   |                 |         |         |         |
| Nares                                  | 28/757 (3.7%)                                | 9/392 (2.3%)      | 16/232 (6.9%)     | 3/133 (2.3%)    |         |         |         |
| Hand                                   | 107/757 (14.1%)                              | 53/392 (13.5%)    | 40/232 (17.2%)    | 14/133 (10.5%)  |         |         |         |
| Groin                                  | 173/744 (23.3%)                              | 92/391 (23.5%)    | 59/227 (26.0%)    | 22/126 (17.5%)  |         |         |         |
| Any Participant Body site <sup>a</sup> | 308/2,258 (13.6%)                            | 154/1,175 (13.1%) | 115/691 (16.6%)   | 39/392 (9.9%)   | 0.033   | 0.16    | 0.181   |
| Bed control                            | 82/757 (10.8%)                               | 38/393 (9.7%)     | 30/232 (12.9%)    | 14/132 (10.6%)  |         |         |         |
| Call button                            | 64/758 (8.4%)                                | 33/393 (8.4%)     | 28/232 (12.1%)    | 3/133 (2.3%)    |         |         |         |

|                                        |                   |                   |                   |                |       |       |       |
|----------------------------------------|-------------------|-------------------|-------------------|----------------|-------|-------|-------|
| Table top                              | 86/756 (11.4%)    | 35/393 (8.9%)     | 43/230 (18.7%)    | 8/133 (6.0%)   |       |       |       |
| TV remote/buttons                      | 84/758 (11.1%)    | 41/393 (10.4%)    | 35/232 (15.1%)    | 8/133 (6.0%)   |       |       |       |
| Privacy curtain                        | 100/744 (13.4%)   | 34/384 (8.9%)     | 57/232 (24.6%)    | 9/128 (7.0%)   |       |       |       |
| Bedrail                                | 95/758 (12.5%)    | 42/393 (10.7%)    | 45/232 (19.4%)    | 8/133 (6.0%)   |       |       |       |
| Toilet seat                            | 115/754 (15.3%)   | 64/392 (16.3%)    | 43/232 (18.5%)    | 8/130 (6.2%)   |       |       |       |
| Any Environmental site <sup>b</sup>    | 626/5,285 (11.8%) | 287/2,741 (10.5%) | 281/1,622 (17.3%) | 58/922 (6.3%)  | 0.354 | 0.441 | 0.007 |
| <b>RGNB</b>                            |                   |                   |                   |                |       |       |       |
| Nares                                  | 19/757 (2.5%)     | 4/392 (1.0%)      | 11/232 (4.7%)     | 4/133 (3.0%)   |       |       |       |
| Hand                                   | 13/757 (1.7%)     | 4/392 (1.0%)      | 4/232 (1.7%)      | 5/133 (3.8%)   |       |       |       |
| Groin                                  | 85/744 (11.4%)    | 35/391 (9.0%)     | 34/227 (15.0%)    | 16/126 (12.7%) |       |       |       |
| Any Participant Body site <sup>a</sup> | 117/2,258 (5.2%)  | 43/1,175 (3.7%)   | 49/691 (7.1%)     | 25/392 (6.4%)  | 0.038 | 0.133 | 0.772 |
| Bed control                            | 8/757 (1.1%)      | 1/393 (0.3%)      | 6/232 (2.6%)      | 1/132 (0.8%)   |       |       |       |
| Call button                            | 4/758 (0.5%)      | 2/393 (0.5%)      | 0/232             | 2/133 (1.5%)   |       |       |       |
| Table top                              | 12/756 (1.6%)     | 5/393 (1.3%)      | 6/230 (2.6%)      | 1/133 (0.8%)   |       |       |       |
| TV remote/buttons                      | 4/758 (0.5%)      | 1/393 (0.3%)      | 1/232 (0.4%)      | 2/133 (1.5%)   |       |       |       |
| Privacy curtain                        | 10/744 (1.3%)     | 3/384 (0.8%)      | 7/232 (3.0%)      | 0/128 (0)      |       |       |       |
| Bedrail                                | 13/758 (1.7%)     | 1/393 (0.3%)      | 8/232 (3.4%)      | 4/133 (3.0%)   |       |       |       |
| Toilet seat                            | 20/754 (2.7%)     | 5/392 (1.3%)      | 13/232 (5.6%)     | 2/130 (1.5%)   |       |       |       |
| Any Environmental site <sup>b</sup>    | 71/5,285 (1.3%)   | 18/2,741 (0.7%)   | 41/1,622 (2.5%)   | 12/922 (1.3%)  | 0.002 | 0.31  | 0.327 |

Two-sided p-values for comparing odds of MDRO contamination or colonization across facilities are based on logistic regression and are adjusted for participant-level correlation in outcomes.

Abbreviations: MDRO, multidrug-resistant organism; MRSA, methicillin-resistant *Staphylococcus aureus*; RGNB, resistant gram-negative bacteria; VRE, vancomycin-resistant enterococci

<sup>a</sup>Number of participants colonized at any of the three body sites sampled (nares, hand, or groin).

<sup>b</sup>Number of participants with environmental contamination at any of the seven environmental sites sampled (bed control, call button, table top, TV remote, privacy curtain, bedrail, or toilet seat).

**Supplementary Table 6.** Number of swabs positive out of swabs collected during interactive visits.

|                        | No. Swabs Positive / No. Swabs Collected (%) |                 |                |              | P-value |         |         |
|------------------------|----------------------------------------------|-----------------|----------------|--------------|---------|---------|---------|
| All MDROs              | All Facilities                               | Facility A      | Facility B     | Facility C   | A vs. B | A vs. C | B vs. C |
| Participant Hands      | 130/920 (14.1%)                              | 100/656 (15.2%) | 24/111 (21.6%) | 6/153 (3.9%) | 0.286   | 0.023   | 0.005   |
| HCP Hands              | 18/314 (5.7%)                                | 10/188 (5.3%)   | 5/86 (5.8%)    | 3/40 (7.5%)  | 0.863   | 0.589   | 0.714   |
| All Surfaces/Equipment | 83/1,682 (4.9%)                              | 48/1,142 (4.2%) | 27/283 (9.5%)  | 8/257 (3.1%) | 0.027   | 0.615   | 0.072   |
| Top 12 Surfaces        |                                              |                 |                |              |         |         |         |
| Walker                 | 11/220 (5.0%)                                | 9/122 (7.4%)    | 1/31 (3.2%)    | 1/67 (1.5%)  |         |         |         |
| Wheelchair             | 2/60 (3.3%)                                  | 0/41 (0)        | 0/3 (0)        | 2/16 (12.5%) |         |         |         |
| Pulse Ox               | 2/138 (1.4%)                                 | 1/123 (0.8%)    | 1/11 (9.1%)    | 0/4 (0)      |         |         |         |
| Stationary bike        | 3/86 (3.5%)                                  | 2/60 (3.3%)     | 1/20 (5.0%)    | 0/6 (0)      |         |         |         |
| Table top              | 5/115 (4.3%)                                 | 4/73 (5.5%)     | 1/38 (2.6%)    | 0/4 (0)      |         |         |         |
| Chair                  | 6/57 (10.5%)                                 | 3/44 (6.8%)     | 3/12 (25.0%)   | 0/1 (0)      |         |         |         |
| Arm bike               | 0/59 (0)                                     | 0/51 (0)        | 0/4 (0)        | 0/4 (0)      |         |         |         |
| Weights                | 1/64 (1.6%)                                  | 1/60 (1.7%)     | -              | 0/4 (0)      |         |         |         |
| Exercise band          | 2/21 (9.5%)                                  | 2/9 (22.2%)     | 0/6 (0)        | 0/6 (0)      |         |         |         |
| Food tray              | 2/49 (4.1%)                                  | 0/18 (0)        | 2/31 (6.5%)    | -            |         |         |         |
| Cane                   | 1/20 (5.0%)                                  | 1/16 (6.3%)     | -              | 0/4 (0)      |         |         |         |
| Bedrail                | 0/9 (0)                                      | 0/2 (0)         | -              | 0/7 (0)      |         |         |         |
| <b>MRSA</b>            |                                              |                 |                |              |         |         |         |
| Participant Hands      | 36/920 (3.9%)                                | 18/656 (2.7%)   | 13/111 (11.7%) | 5/153 (3.3%) | 0.007   | 0.826   | 0.082   |
| HCP Hands              | 4/314 (1.3%)                                 | 1/188 (0.5%)    | 2/86 (2.3%)    | 1/40 (2.5%)  | 0.233   | 0.271   | 0.953   |
| All Surfaces/Equipment | 25/1,682 (1.5%)                              | 10/1,142 (0.9%) | 9/283 (3.2%)   | 6/257 (2.3%) | 0.011   | 0.209   | 0.699   |
| Top 12 Surfaces        |                                              |                 |                |              |         |         |         |
| Walker                 | 2/220 (0.9%)                                 | 1/122 (0.8%)    | 0/31 (0)       | 1/67 (1.5%)  |         |         |         |
| Wheelchair             | 2/60 (3.3%)                                  | 0/41 (0)        | 0/3 (0)        | 2/16 (12.5%) |         |         |         |
| Pulse Ox               | 2/138 (1.4%)                                 | 1/123 (0.8%)    | 1/11 (9.1%)    | 0/4 (0)      |         |         |         |
| Stationary bike        | 0/86 (0)                                     | 0/60 (0)        | 0/20 (0)       | 0/6 (0)      |         |         |         |
| Table top              | 1/115 (0.9%)                                 | 0/73 (0)        | 1/38 (2.6%)    | 0/4 (0)      |         |         |         |
| Chair                  | 0/57 (0)                                     | 0/44 (0)        | 0/12 (0)       | 0/1 (0)      |         |         |         |
| Arm bike               | 0/59 (0)                                     | 0/51 (0)        | 0/4 (0)        | 0/4 (0)      |         |         |         |
| Weights                | 0/64 (0)                                     | 0/60 (0)        | -              | 0/4 (0)      |         |         |         |
| Exercise band          | 1/21 (4.8%)                                  | 1/9 (11.1%)     | 0/6 (0)        | 0/6 (0)      |         |         |         |
| Food tray              | 2/49 (4.1%)                                  | 0/18 (0)        | 2/31 (6.5%)    | -            |         |         |         |
| Cane                   | 0/20 (0)                                     | 0/16 (0)        | -              | 0/4 (0)      |         |         |         |

|                        |                 |                 |                |              |       |       |       |
|------------------------|-----------------|-----------------|----------------|--------------|-------|-------|-------|
| Bedrail                | 0/9 (0)         | 0/2 (0)         | -              | 0/7 (0)      |       |       |       |
| <b>VRE</b>             |                 |                 |                |              |       |       |       |
| Participant Hands      | 93/920 (10.1%)  | 80/656 (12.2%)  | 12/111 (10.8%) | 1/153 (0.7%) | 0.816 | 0.004 | 0.01  |
| HCP Hands              | 14/314 (4.5%)   | 9/188 (4.8%)    | 3/86 (3.5%)    | 2/40 (5.0%)  | 0.607 | 0.955 | 0.681 |
| All Surfaces/Equipment | 57/1,682 (3.4%) | 37/1,142 (3.2%) | 20/283 (7.1%)  | 0/257 (0)    | 0.092 | -     | -     |
| Top 12 Surfaces        |                 |                 |                |              |       |       |       |
| Walker                 | 10/220 (4.5%)   | 9/122 (7.4%)    | 1/31 (3.2%)    | 0/67 (0)     |       |       |       |
| Wheelchair             | 0/60 (0)        | 0/41 (0)        | 0/3 (0)        | 0/16 (0)     |       |       |       |
| Pulse Ox               | 0/138 (0)       | 0/123 (0)       | 0/11 (0)       | 0/4 (0)      |       |       |       |
| Stationary bike        | 3/86 (3.5%)     | 2/60 (3.3%)     | 1/20 (5.0%)    | 0/6 (0)      |       |       |       |
| Table top              | 4/115 (3.5%)    | 4/73 (5.5%)     | 0/38 (0)       | 0/4 (0)      |       |       |       |
| Chair                  | 6/57 (10.5%)    | 3/44 (6.8%)     | 3/12 (25.0%)   | 0/1 (0)      |       |       |       |
| Arm bike               | 0/59 (0)        | 0/51 (0)        | 0/4 (0)        | 0/4 (0)      |       |       |       |
| Weights                | 1/64 (1.6%)     | 1/60 (1.7%)     | -              | 0/4 (0)      |       |       |       |
| Exercise band          | 1/21 (4.8%)     | 1/9 (11.1%)     | 0/6 (0)        | 0/6 (0)      |       |       |       |
| Food tray              | 1/49 (2.0%)     | 0/18 (0)        | 1/31 (3.2%)    | -            |       |       |       |
| Cane                   | 1/20 (5.0%)     | 1/16 (0.6%)     | -              | 0/4 (0)      |       |       |       |
| Bedrail                | 0/9 (0)         | 0/2 (0)         | -              | 0/7 (0)      |       |       |       |
| <b>RGNB</b>            |                 |                 |                |              |       |       |       |
| Participant Hands      | 3/920 (0.3%)    | 3/656 (0.5%)    | 0/111 (0)      | 0/153 (0)    | -     | -     | -     |
| HCP Hands              | 2/314 (0.6%)    | 0/188 (0)       | 1/86 (1.2%)    | 1/40 (2.5%)  | -     | -     | 0.59  |
| All Surfaces/Equipment | 5/1,682 (0.3%)  | 2/1,142 (0.2%)  | 1/283 (0.4%)   | 2/257 (0.8%) | 0.566 | 0.113 | 0.566 |
| Top 12 Surfaces        |                 |                 |                |              |       |       |       |
| Walker                 | 0/220 (0)       | 0/122 (0)       | 0/31 (0)       | 0/67 (0)     |       |       |       |
| Wheelchair             | 0/60 (0)        | 0/41 (0)        | 0/3 (0)        | 0/16 (0)     |       |       |       |
| Pulse Ox               | 0/138 (0)       | 0/123 (0)       | 0/11 (0)       | 0/4 (0)      |       |       |       |
| Stationary bike        | 0/86 (0)        | 0/60 (0)        | 0/20 (0)       | 0/6 (0)      |       |       |       |
| Table top              | 0/115 (0)       | 0/73 (0)        | 0/38 (0)       | 0/4 (0)      |       |       |       |
| Chair                  | 0/57 (0)        | 0/44 (0)        | 0/12 (0)       | 0/1 (0)      |       |       |       |
| Arm bike               | 0/59 (0)        | 0/51 (0)        | 0/4 (0)        | 0/4 (0)      |       |       |       |
| Weights                | 0/64 (0)        | 0/60 (0)        | -              | 0/4 (0)      |       |       |       |
| Exercise band          | 0/21 (0)        | 0/9 (0)         | 0/6 (0)        | 0/6 (0)      |       |       |       |
| Food tray              | 0/49 (0)        | 0/18 (0)        | 0/31 (0)       | -            |       |       |       |
| Cane                   | 0/20 (0)        | 0/16 (0)        | -              | 0/4 (0)      |       |       |       |
| Bedrail                | 0/9 (0)         | 0/2 (0)         | -              | 0/7 (0)      |       |       |       |

Two-sided p-values for comparing odds of MDRO contamination or colonization across facilities are based on logistic regression and are adjusted for participant-level correlation in outcomes.

Abbreviations: HCP, healthcare personnel; MDRO, multidrug-resistant organism; MRSA, methicillin-resistant *Staphylococcus aureus*; RGNB, resistant gram-negative bacteria; VRE, vancomycin-resistant enterococci

## SUPPLEMENTARY FIGURES

**Supplementary Figure 1.** Resident enrollment

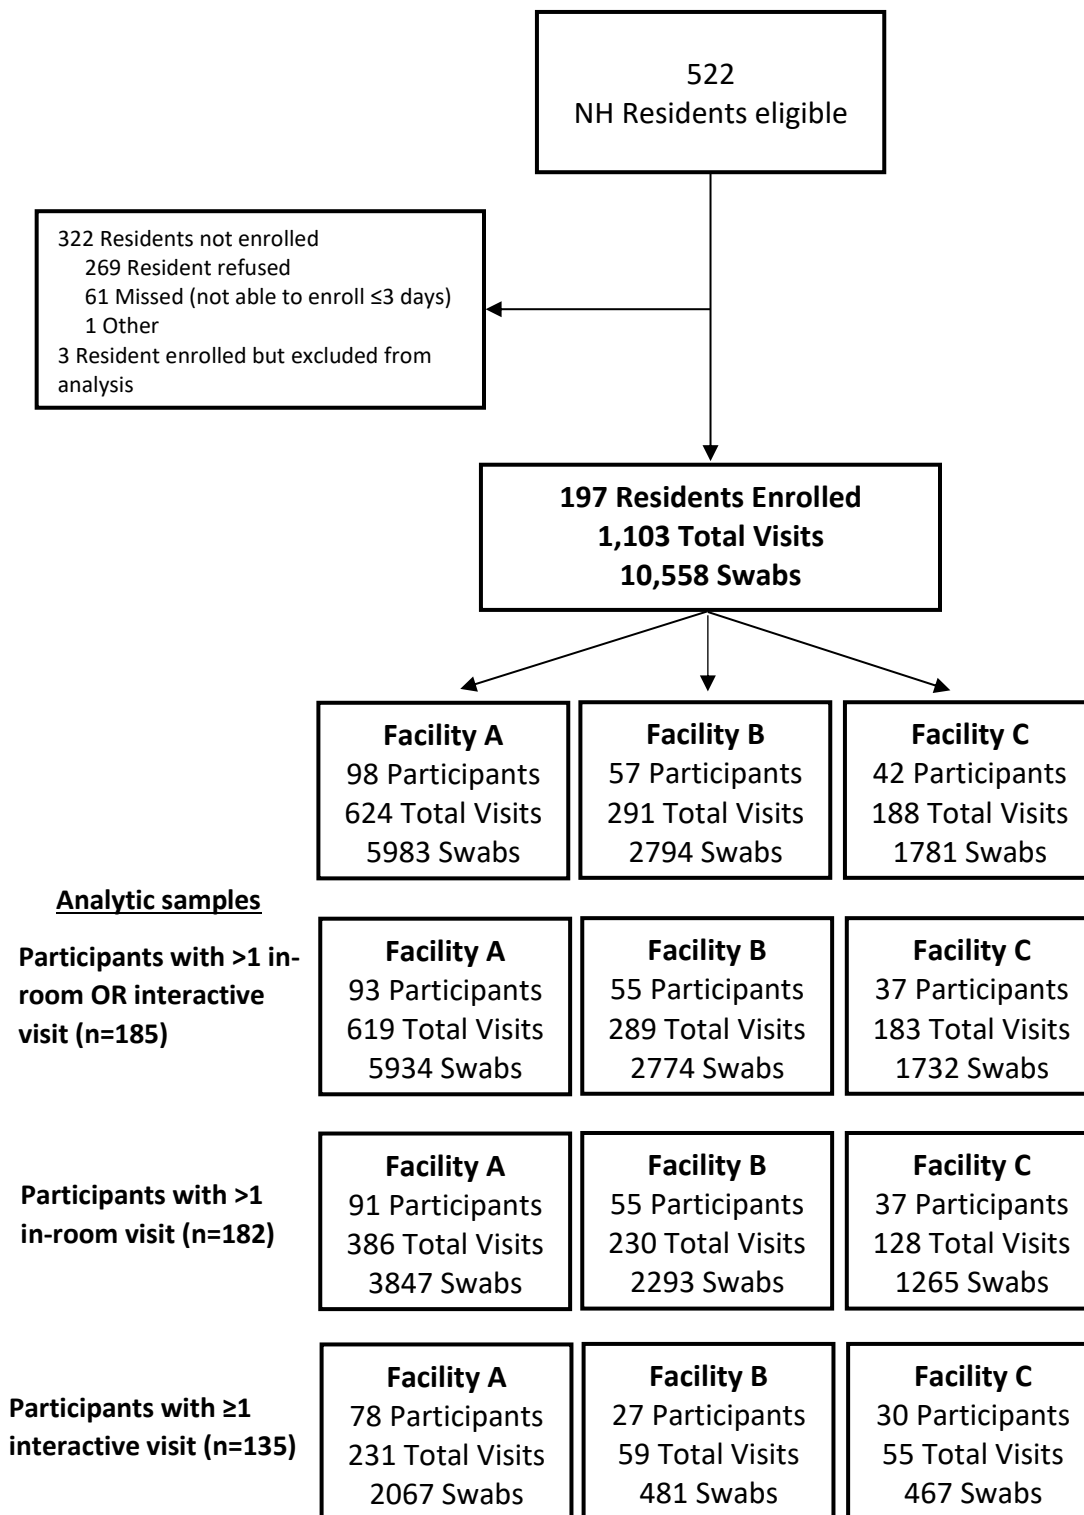

**Supplementary Figure 1.** Flow of data from eligible to final enrolled analytic sample. Among the 185 participants with at least one follow-up visit (in-room or interactive), 175 were seen on day seven, 139 on day 14, 110 on day 21, 91 on day 30, 28 on day 60, and 18 on day 90. Total days of follow-up for the sample of 185 participants was 6,442 days.

**Supplementary Figure 2.** Participant body sites colonized during in-room visits at facility A (a), B (b), and C (c)

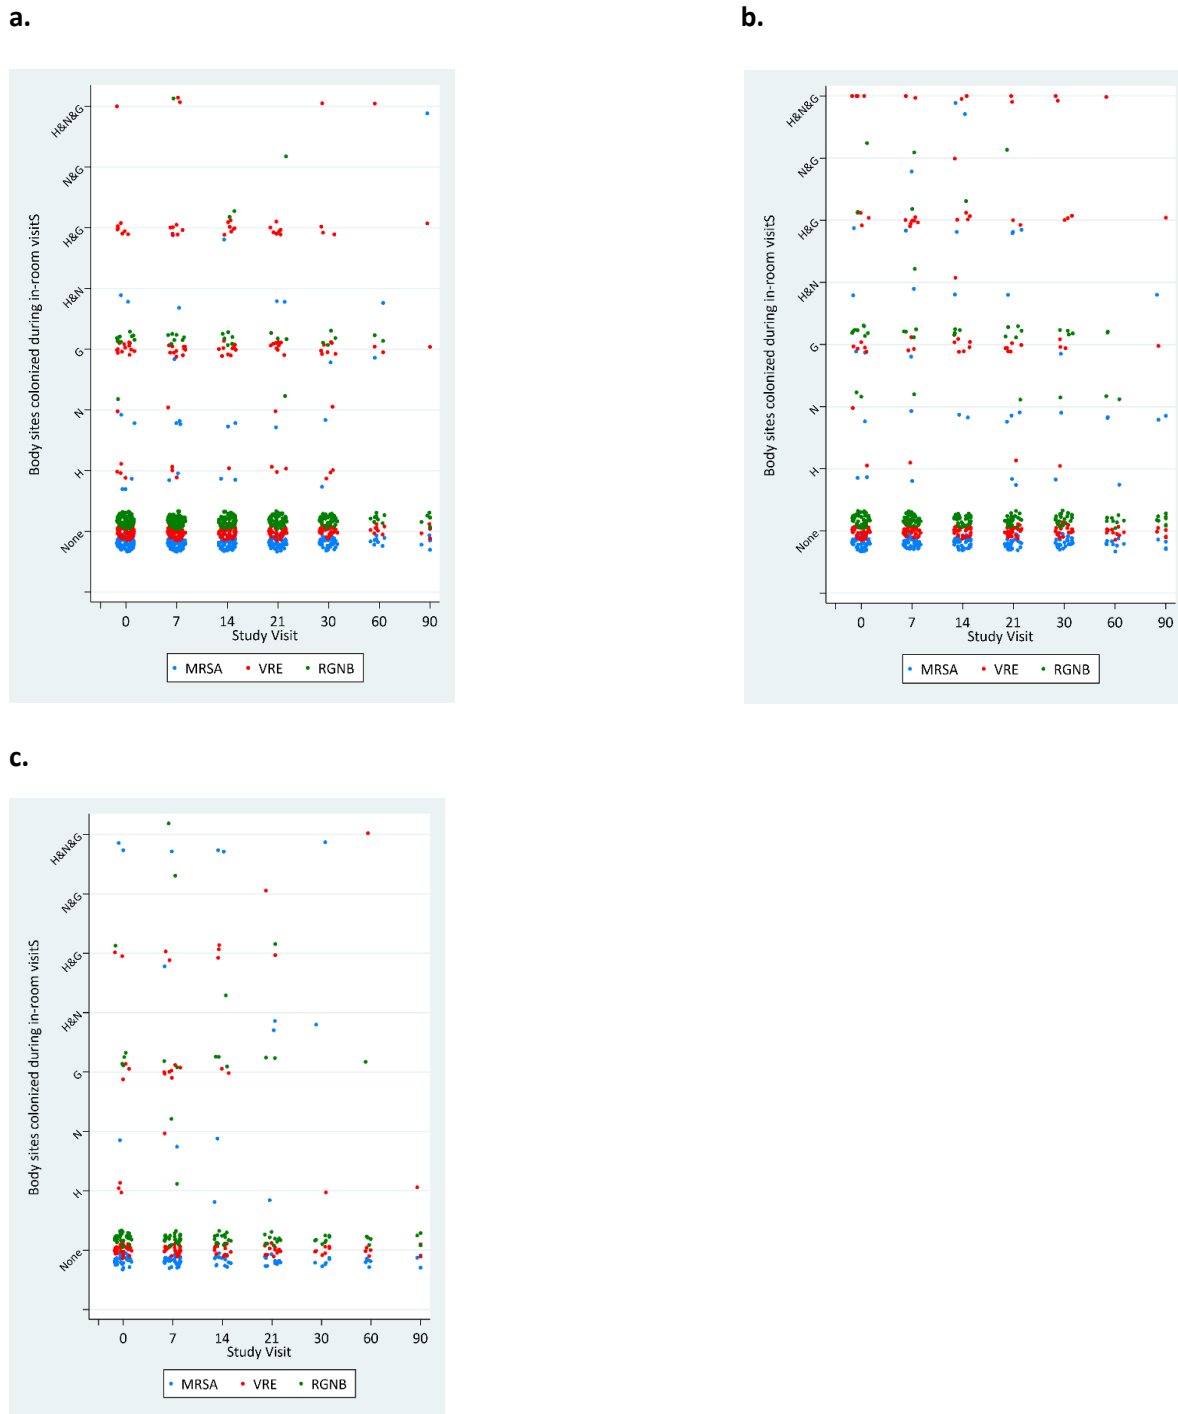

**Supplementary Figure 2.** Each participant is represented by a single dot. Blue dots indicate MRSA colonization; red dots indicate VRE colonization; green dots indicate R-GNB colonization. Study visits on the x-axis are numbered 0, 7, 14, 21, 30, 60, 90, as these visits were collected at study baseline (day 0), and then 7 days, 14 days, 21 days, 30 days, 60 days, and 90 days since baseline. Body sites colonized during in-room visits appears on the y-axis: colonization at zero body sites (none), a single body site only (N, nares; H, hand; or G, groin), as well as colonization with the same organism at multiple body sites (H&N, hand and nares; H&G, hand and groin; N&G, nares and groin; and H&N&G, hand and nares and groin) is included. Source data are provided for this figure. Abbreviations: MRSA, methicillin-resistant *Staphylococcus aureus*; RGNB, resistant gram-negative bacteria; VRE, vancomycin-resistant enterococci

**Supplementary Figure 3.** Participant body sites colonized during interactive visits at facility A (a), B (b), and C (c)

a.

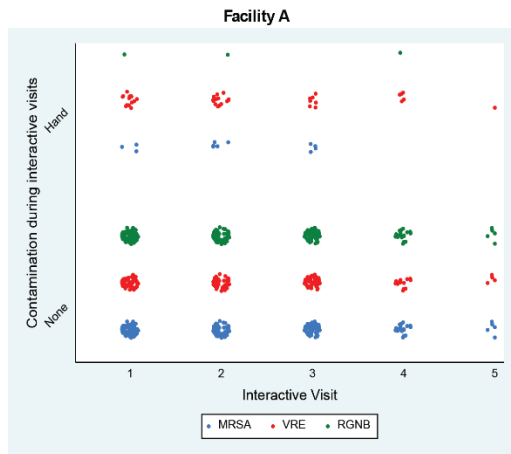

b.

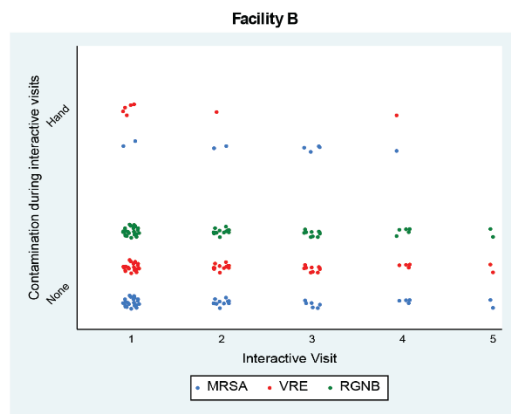

c.

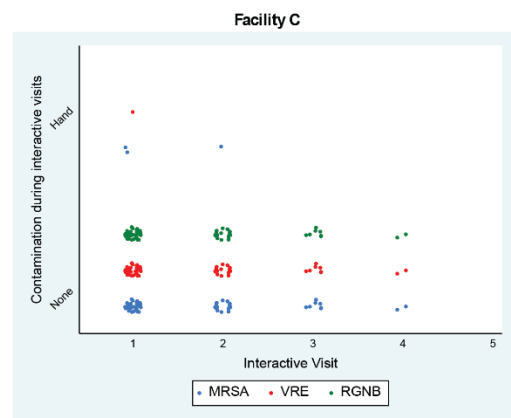

**Supplementary Figure 3.** Participant body sites colonized during interactive visits at facility A (a), B (b), and C (c). Each participant is represented by a single dot. Blue dots indicate MRSA colonization; red dots indicate VRE colonization; green dots indicate R-GNB colonization. Study visits on the x-axis are numbered 1-5. These visits were not conducted at a predetermined frequency, but rather at any point throughout a participant's stay in the study. On average, the first interactive visit occurred 9.3 days (SD 12.0) after study enrollment; the second interactive visit occurred 14.2 days (SD 14.7) after study enrollment; the third interactive visit occurred 20.3 days (SD 17.8) after study enrollment; the fourth interactive visit occurred 34.1 days (SD 26.0) after study enrollment; and the fifth interactive visit occurred 48.0 days (SD 31.2) after study enrollment. Source data are provided for this figure. Abbreviations: MRSA, methicillin-resistant *Staphylococcus aureus*; RGNB, resistant gram-negative bacteria; VRE, vancomycin-resistant enterococci



**Supplementary Figure 4.** Changes in MDRO colonization status from baseline to discharge at facilities A (a), B (b), and C (c)

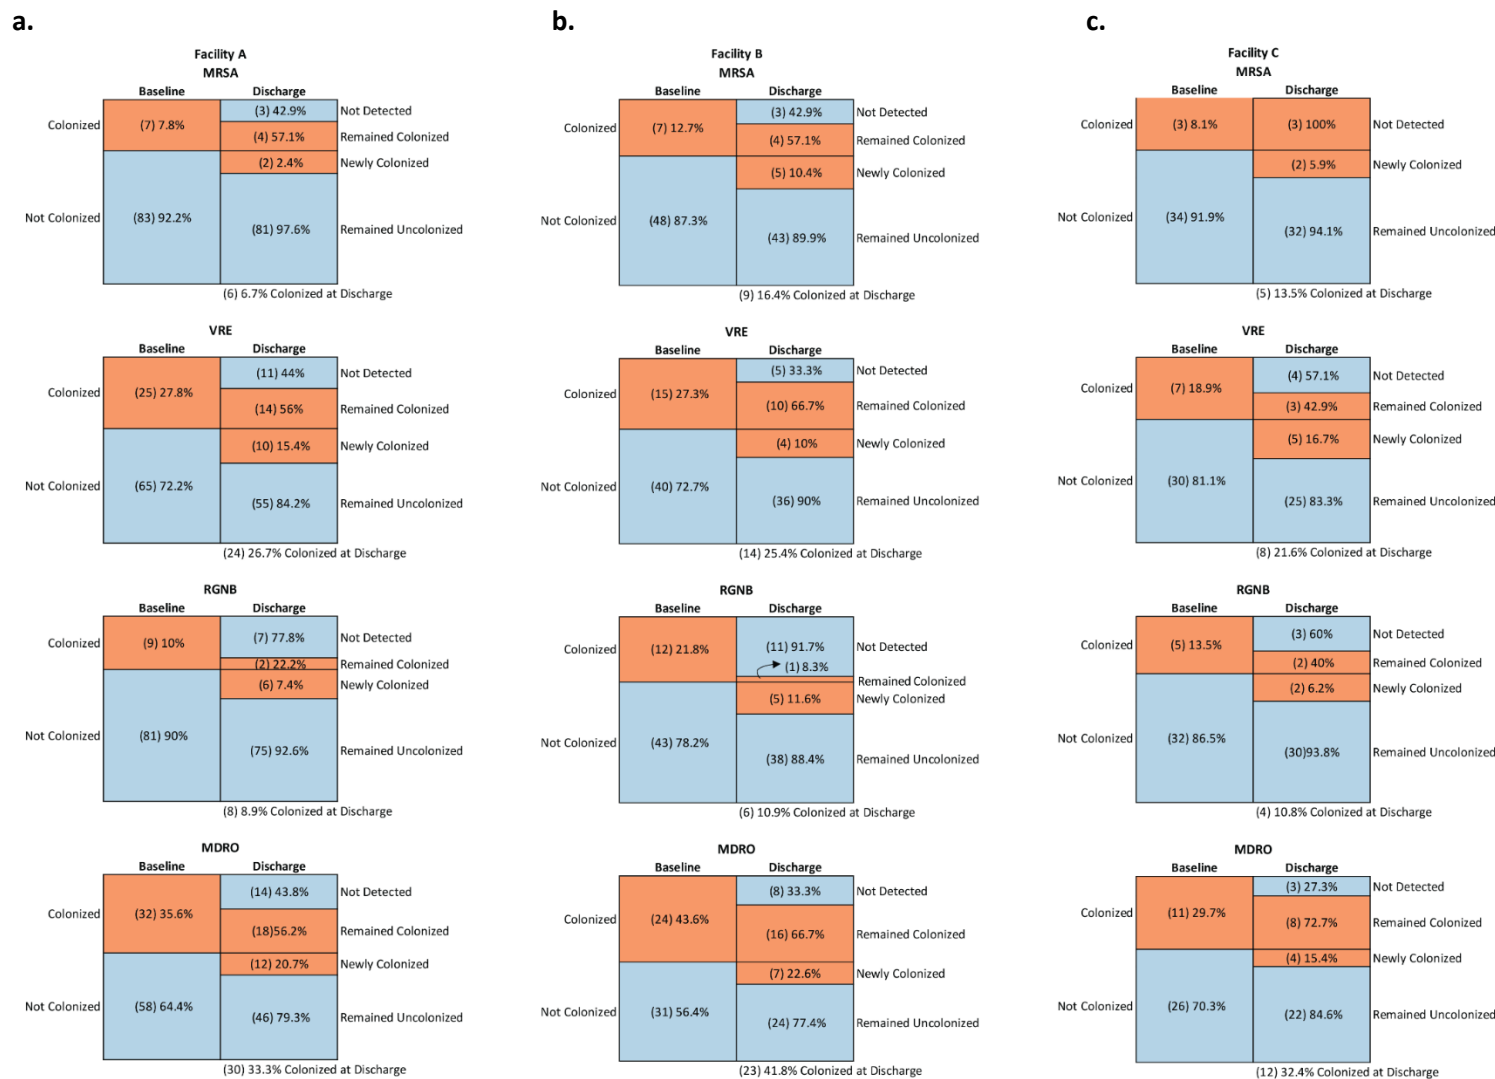

**Supplementary Figure 4.** Numbers in each box indicate the number of participants with a given colonization status at study baseline or discharge. For example, at Facility A, 25 participants who had multiple in-room visits were colonized with VRE at baseline. Of those, 14 (56.0%) remained colonized at discharge. The remaining 11 (44.0%) did not have detectable colonization and were clear at discharge. Alternatively, 65 participants who had multiple in-room visits were not colonized with VRE at baseline. Of those, 10 (15.4%) acquired VRE during their NH stay, while 55 (84.2%) remained not colonized with VRE. Source data are provided for this figure. Abbreviations: MDRO, multidrug-resistant organism; MRSA, methicillin-resistant *Staphylococcus aureus*; NH, nursing home; RGNB, resistant gram-negative bacilli; VRE, vancomycin-resistant enterococci. Source data are provided for this figure.

**Supplementary Figure 5.** Genomics support of microbiological linkages among two participants

**a.**

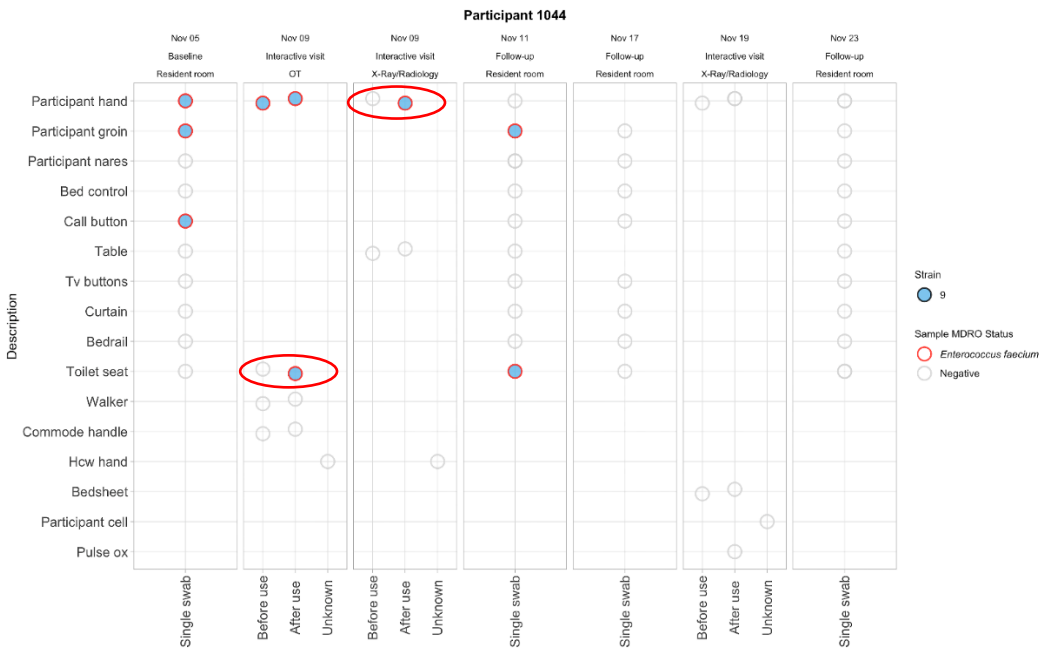

**b.**

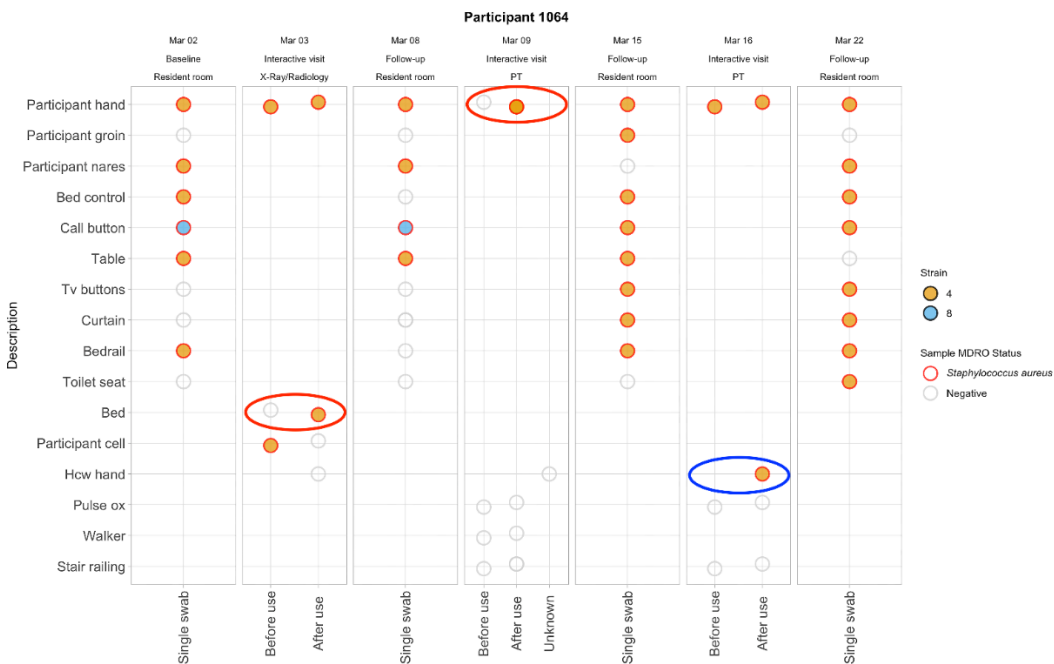

**Supplementary Figure 5.** Column headings indicate date, location, and type (in-room: baseline or follow-up; or interactive) of each study visit. Transmission events are identified with a red circle; single positive swabs not able to be assessed for transmission are identified with a blue circle. White circles outlined gray are samples collected and negative for any MDRO; colored circles outlined in red are samples collected and positive for a particular strain (listed in each legend). **a.** For participant 1044, VRE strain 9 was detected at multiple body sites and an environmental surface at study baseline. Transmission of VRE strain 9 occurred at an interactive visit to OT (Nov 9). The participant's hand was colonized with VRE throughout the OT session, and transmission of an identical VRE strain from the participant's hand (source) to the toilet seat was confirmed by genomic sequencing. At the second interactive visit that same day (Nov 9) to Radiology, the participant's hand is negative for any MDRO at the start of the session, but became positive for VRE strain 9 at the

end of the session. Within this interactive visit alone, it is not clear where that VRE comes from on the participant hand (unknown source); however, sequencing allows us to conclude that this participant was transiently colonized at the hand with VRE strain 9. **b.** For participant 1064, MRSA strain 4 was detected at multiple body sites and environmental surfaces at study baseline, as well as MRSA strain 8 at one environmental surface. Transmission of MRSA strain 4 occurred at an interactive visit to Radiology (X-ray) (March 3). The bed goes from negative to positive for MRSA strain 4 following participant use, and the participant's hand was colonized with that same strain at the start of the session, confirming it is the source of the transmission. At the second interactive visit to PT (March 9), the participant's hand is negative for any MDRO at the start of the session but becomes positive for MRSA strain 4 at the end of the session. Within this interactive visit alone, it is not clear where that MRSA comes from on the participant hand (unknown source); however, sequencing allows us to conclude that this participant was transiently colonized at the hand with MRSA strain 4. Abbreviations: MDRO, multidrug-resistant organism; OT, occupational therapy; PT, physical therapy; VRE, vancomycin-resistant enterococci.

**Supplementary Figure 6.** MRSA and VRE strain diversity in the overall participant population and between epidemiologically linked carriers.

**a.**

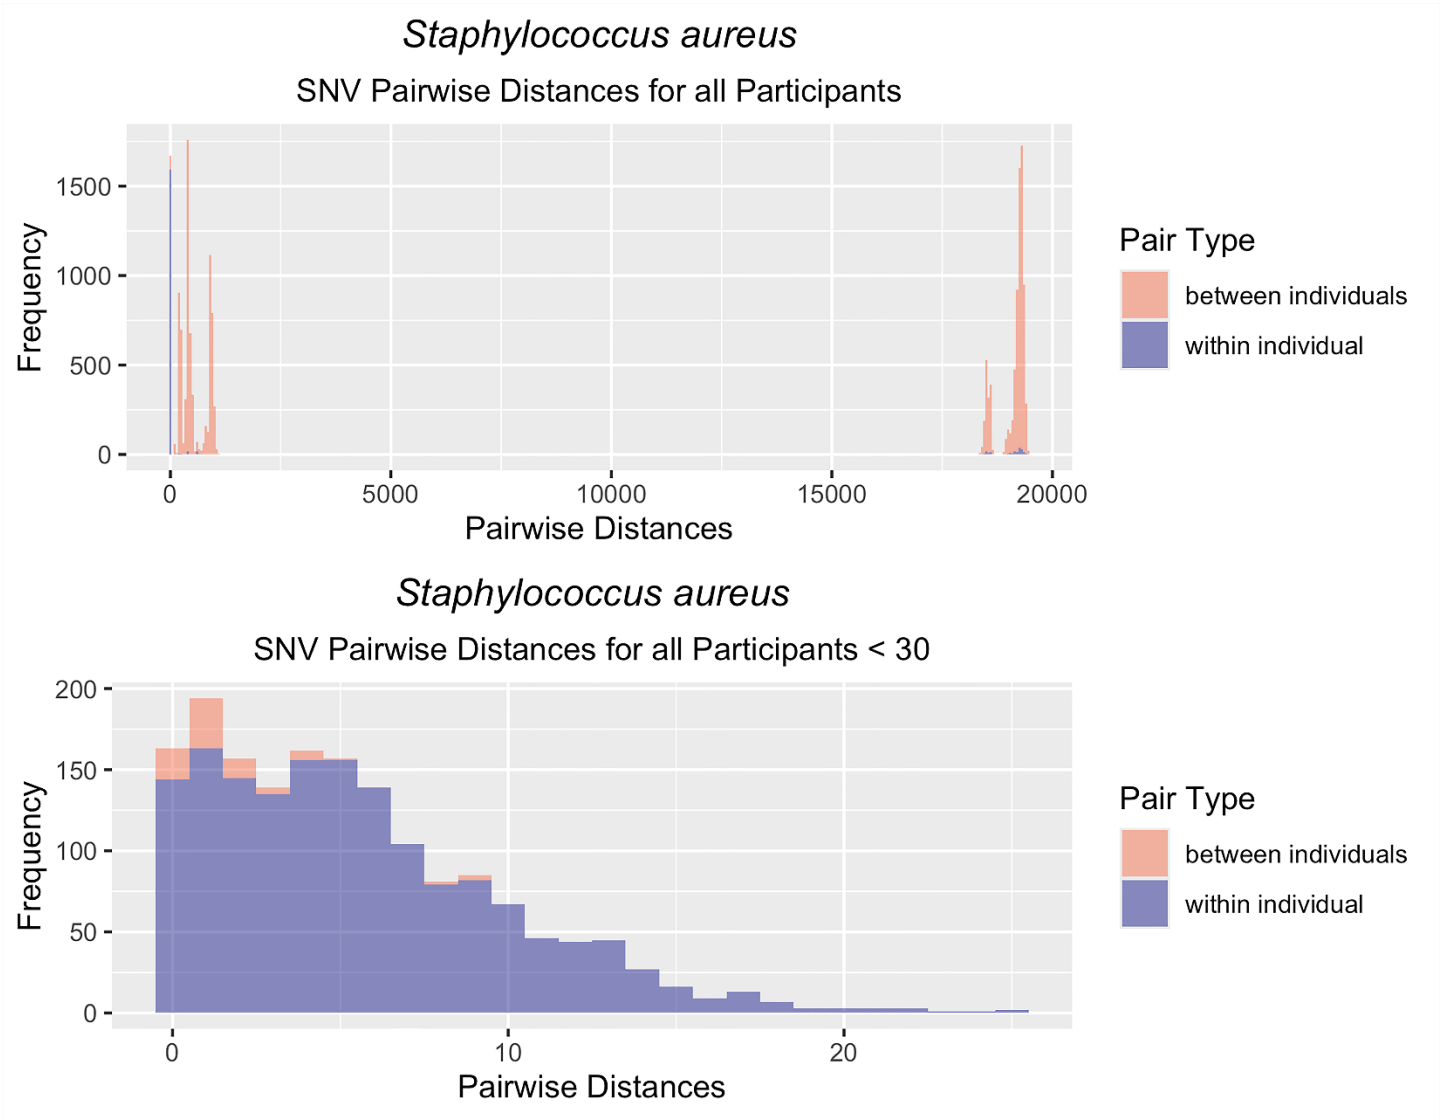

b.

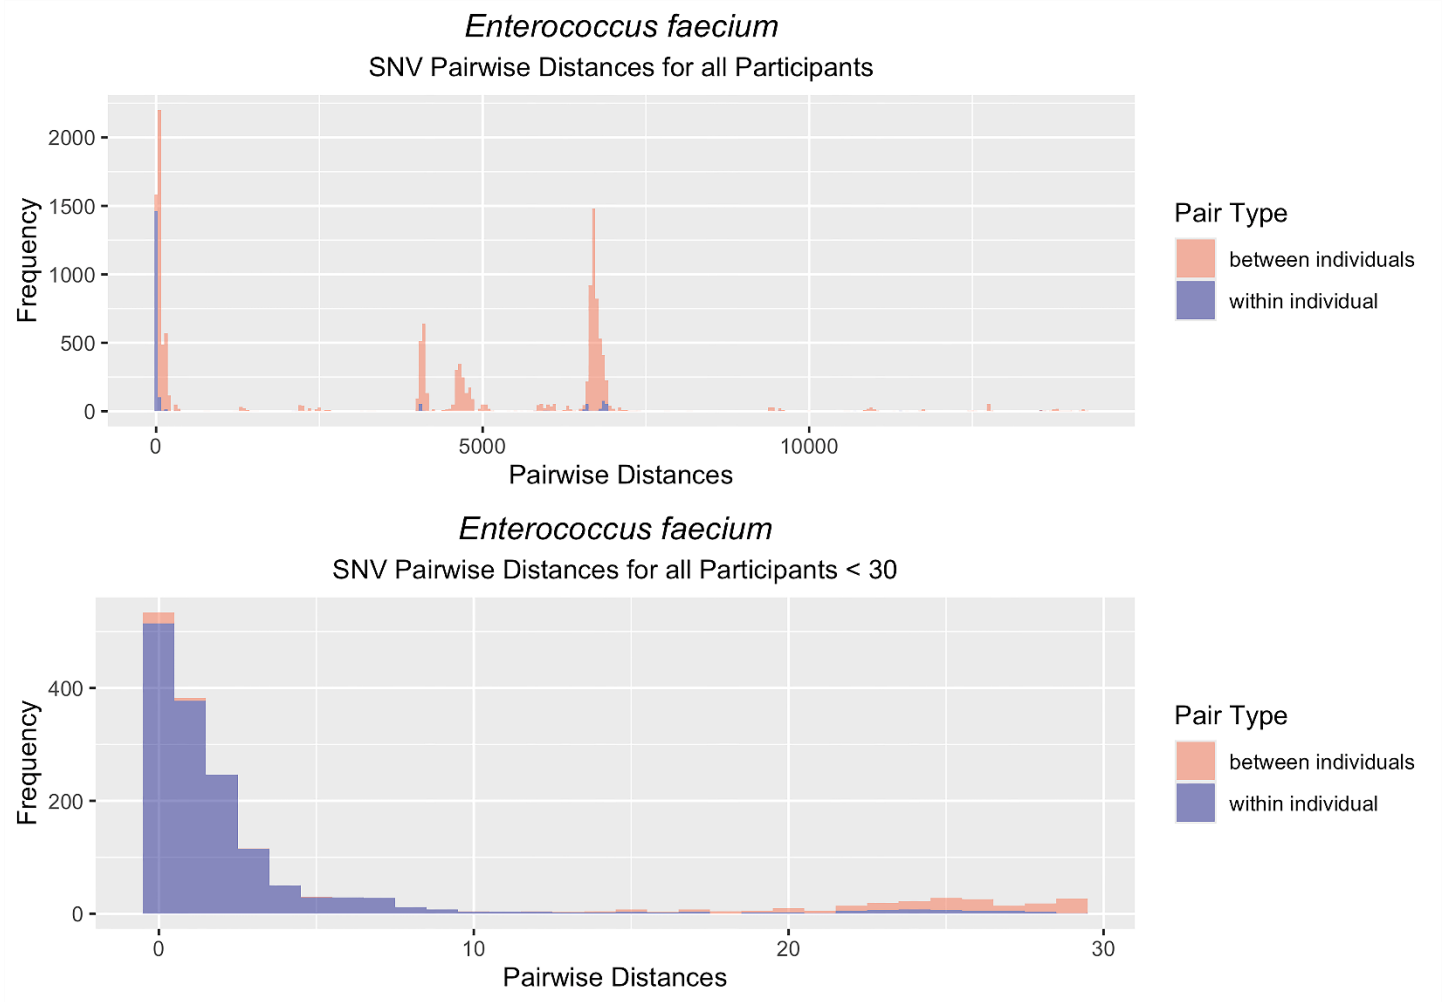

c.

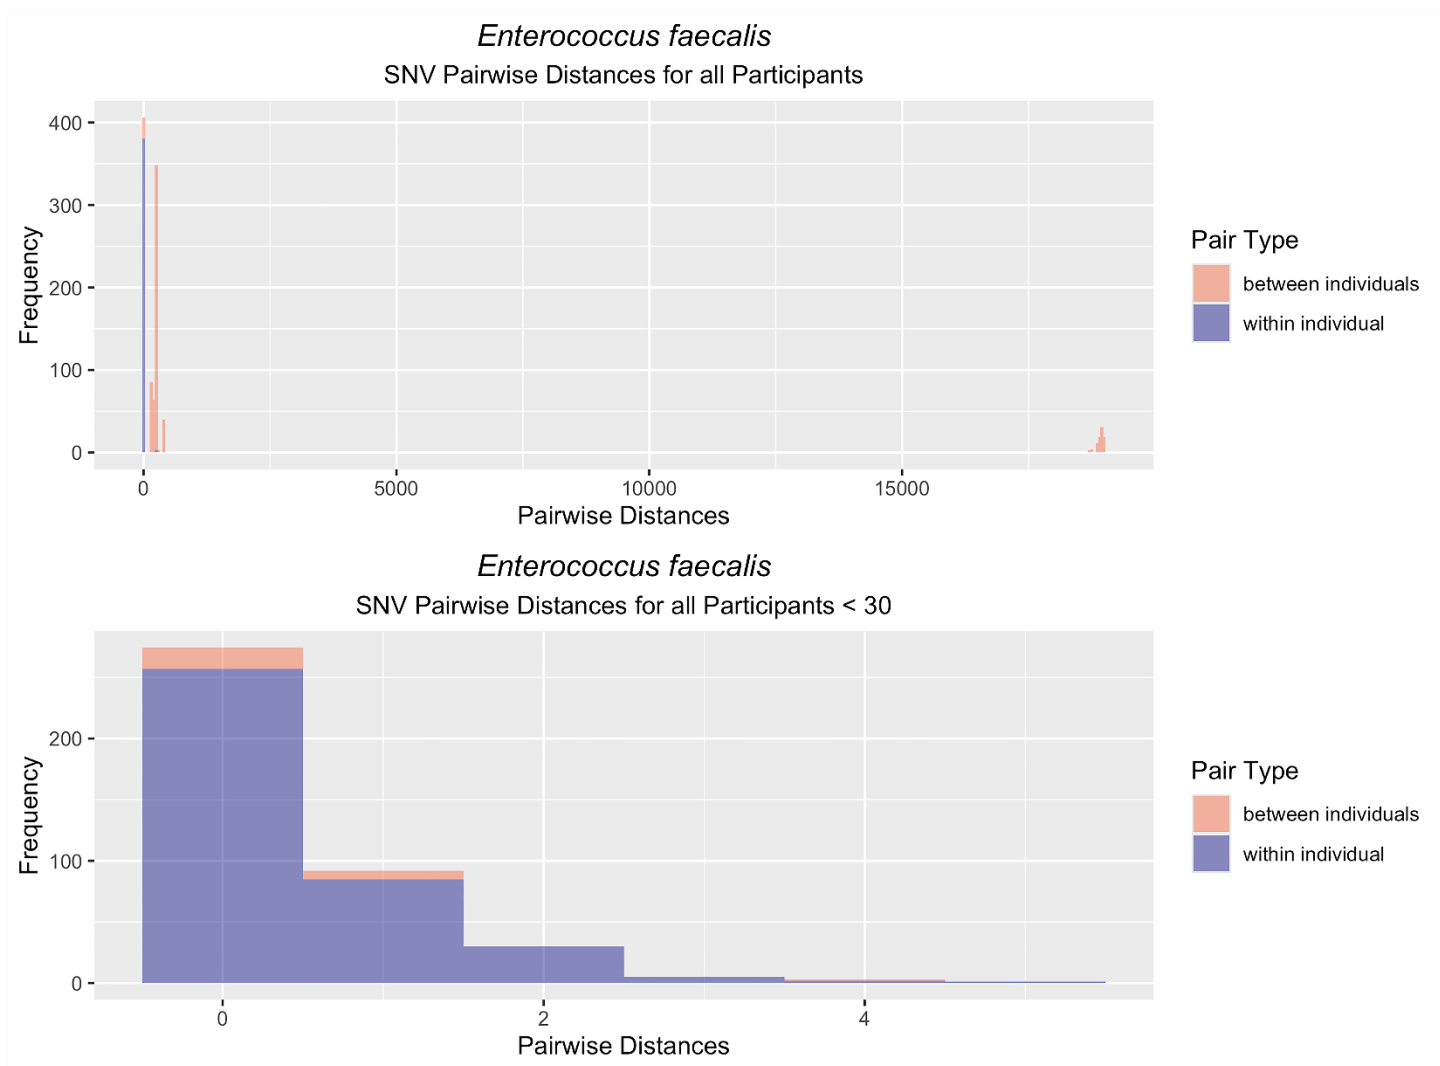

**Supplementary Figure 6.** MRSA and VRE strain diversity in the overall participant population and between epidemiologically linked carriers. **a.** Genomic distance between *Staphylococcus aureus* isolates between individuals (orange) compared to within individuals (blue). **b.** Genomic distance between *Enterococcus faecium* isolates between individuals (orange) compared to within individuals (blue). **c.** Genomic distance between *Enterococcus faecalis* isolates between individuals (orange) compared to within individuals (blue).

**Supplementary Figure 7.** Phylogenies for: a. Facility A *E. faecium*; b. Facility A *S. aureus*; c. Facility B *E. faecium*; d. Facility B *S. aureus*; e. Facility C *S. aureus*; and f. All *E. faecalis*

a.

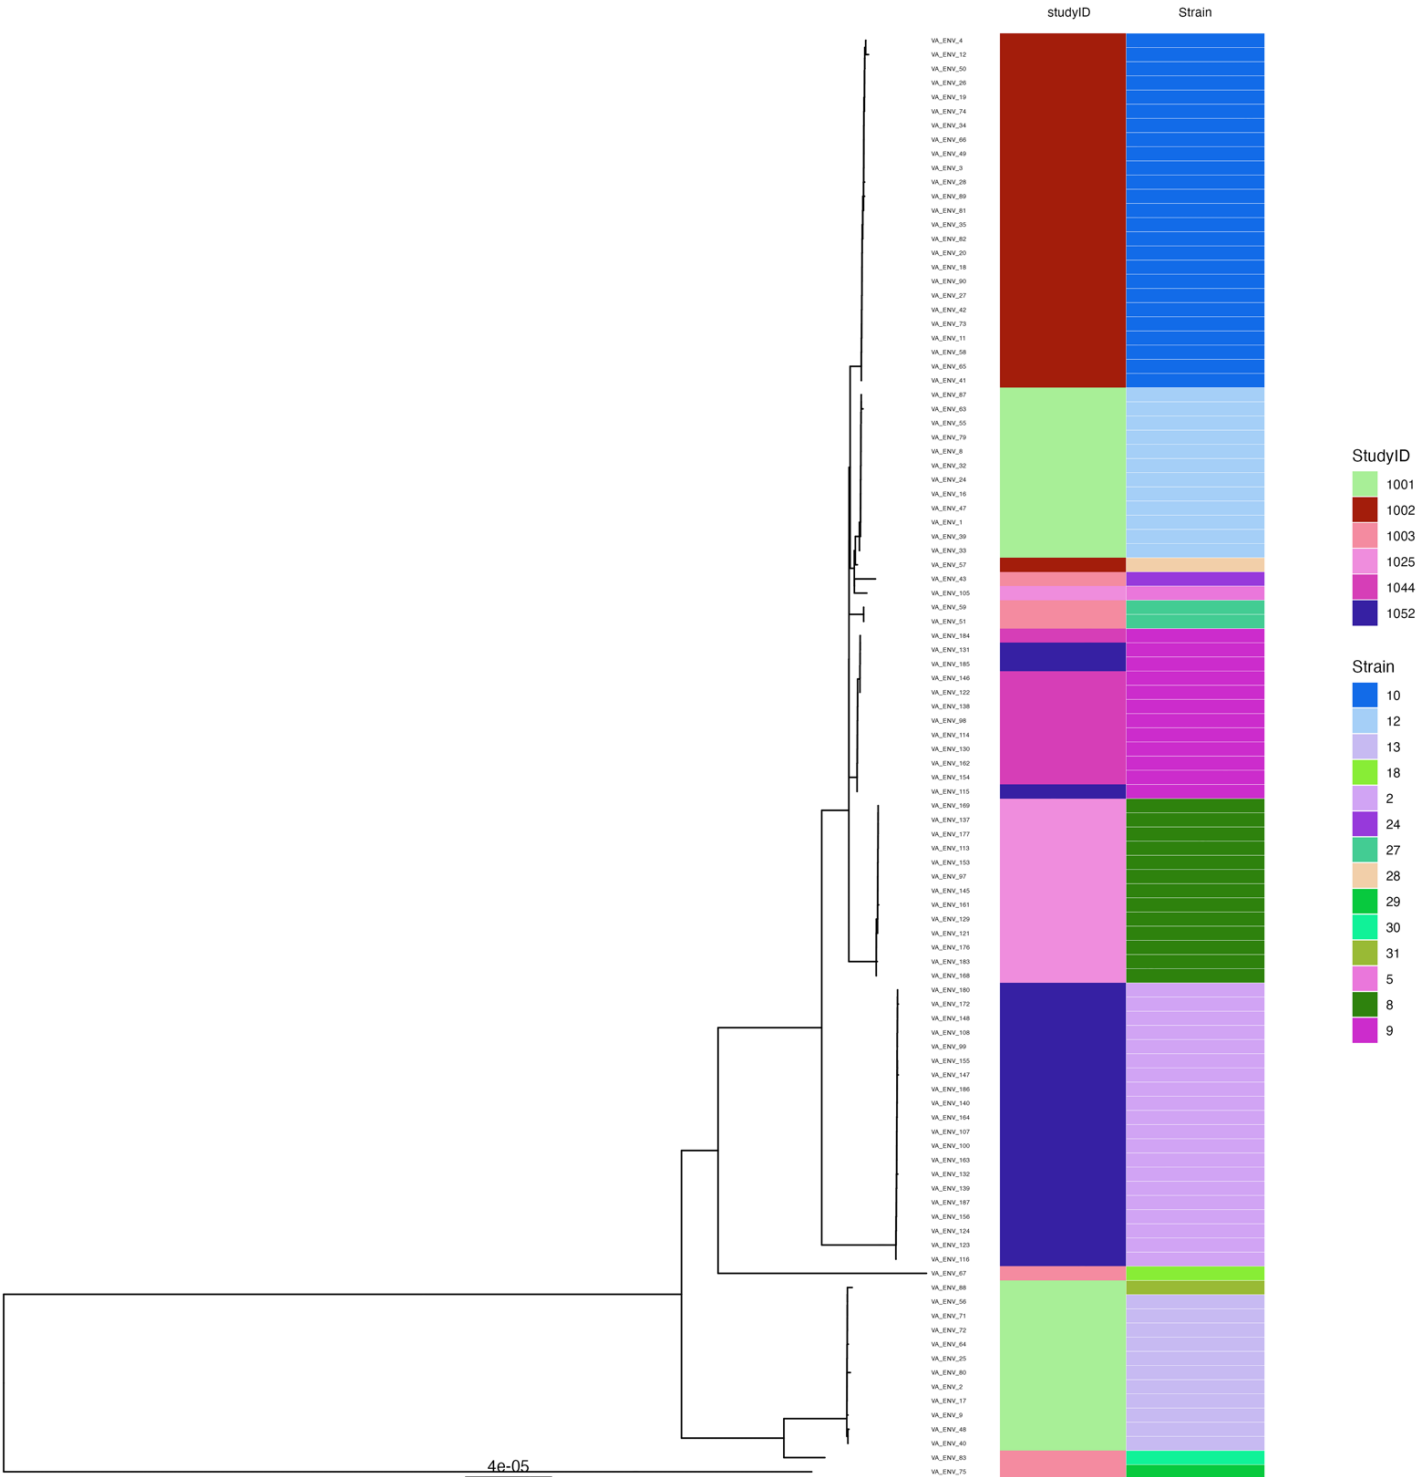

b.

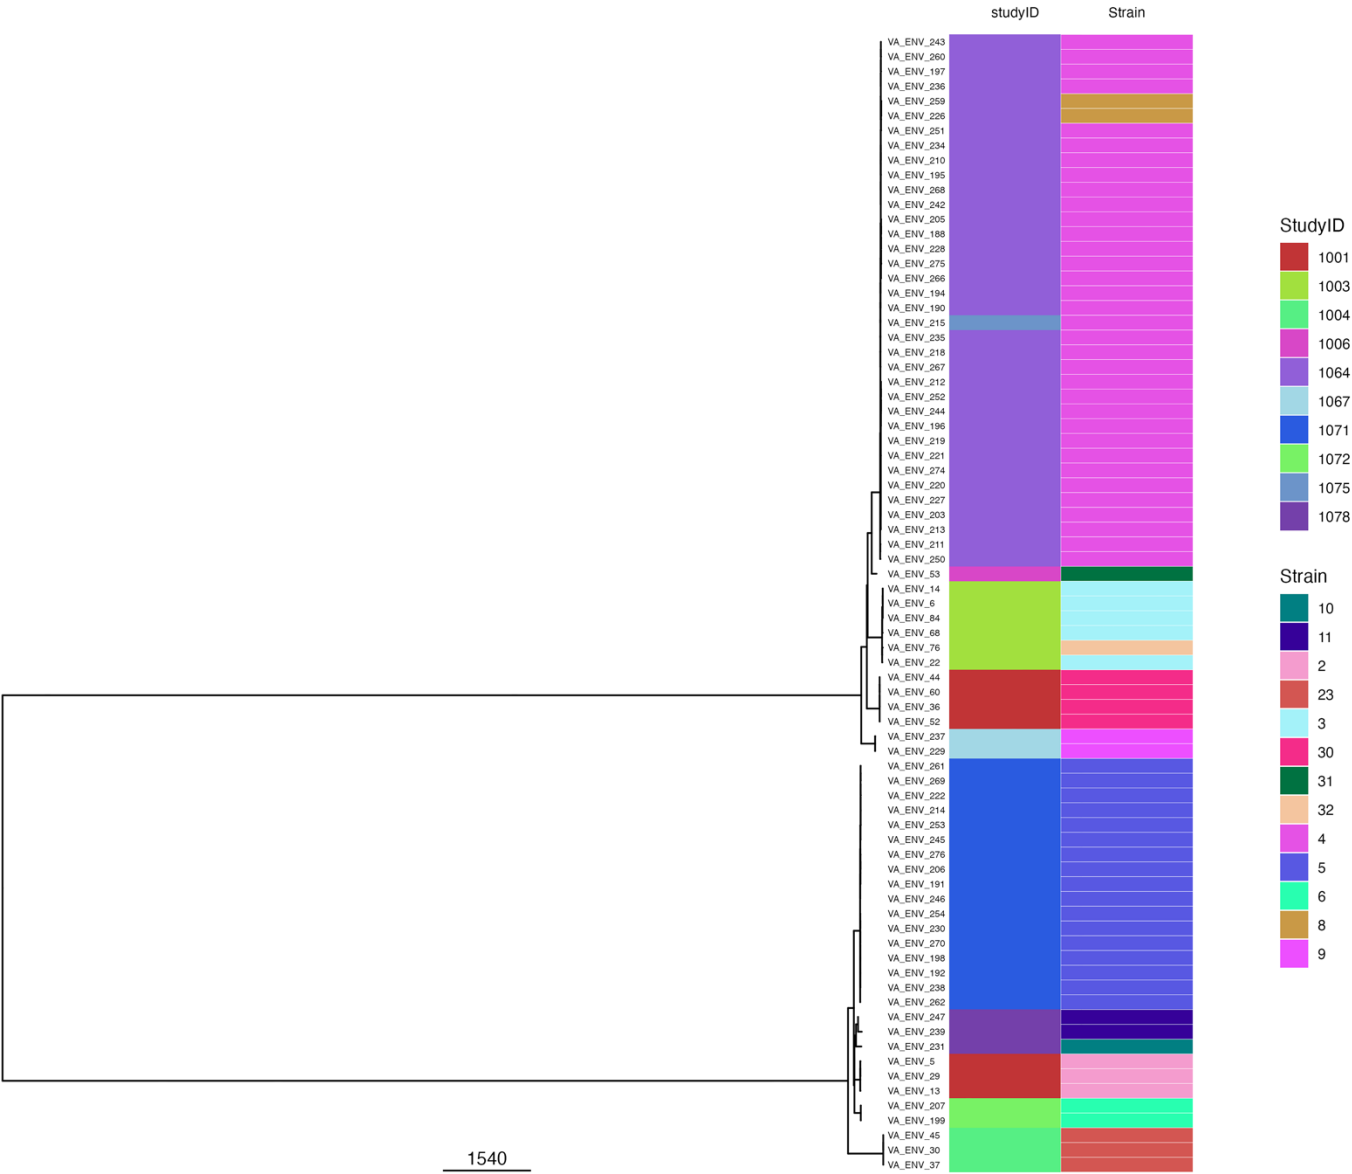



C.

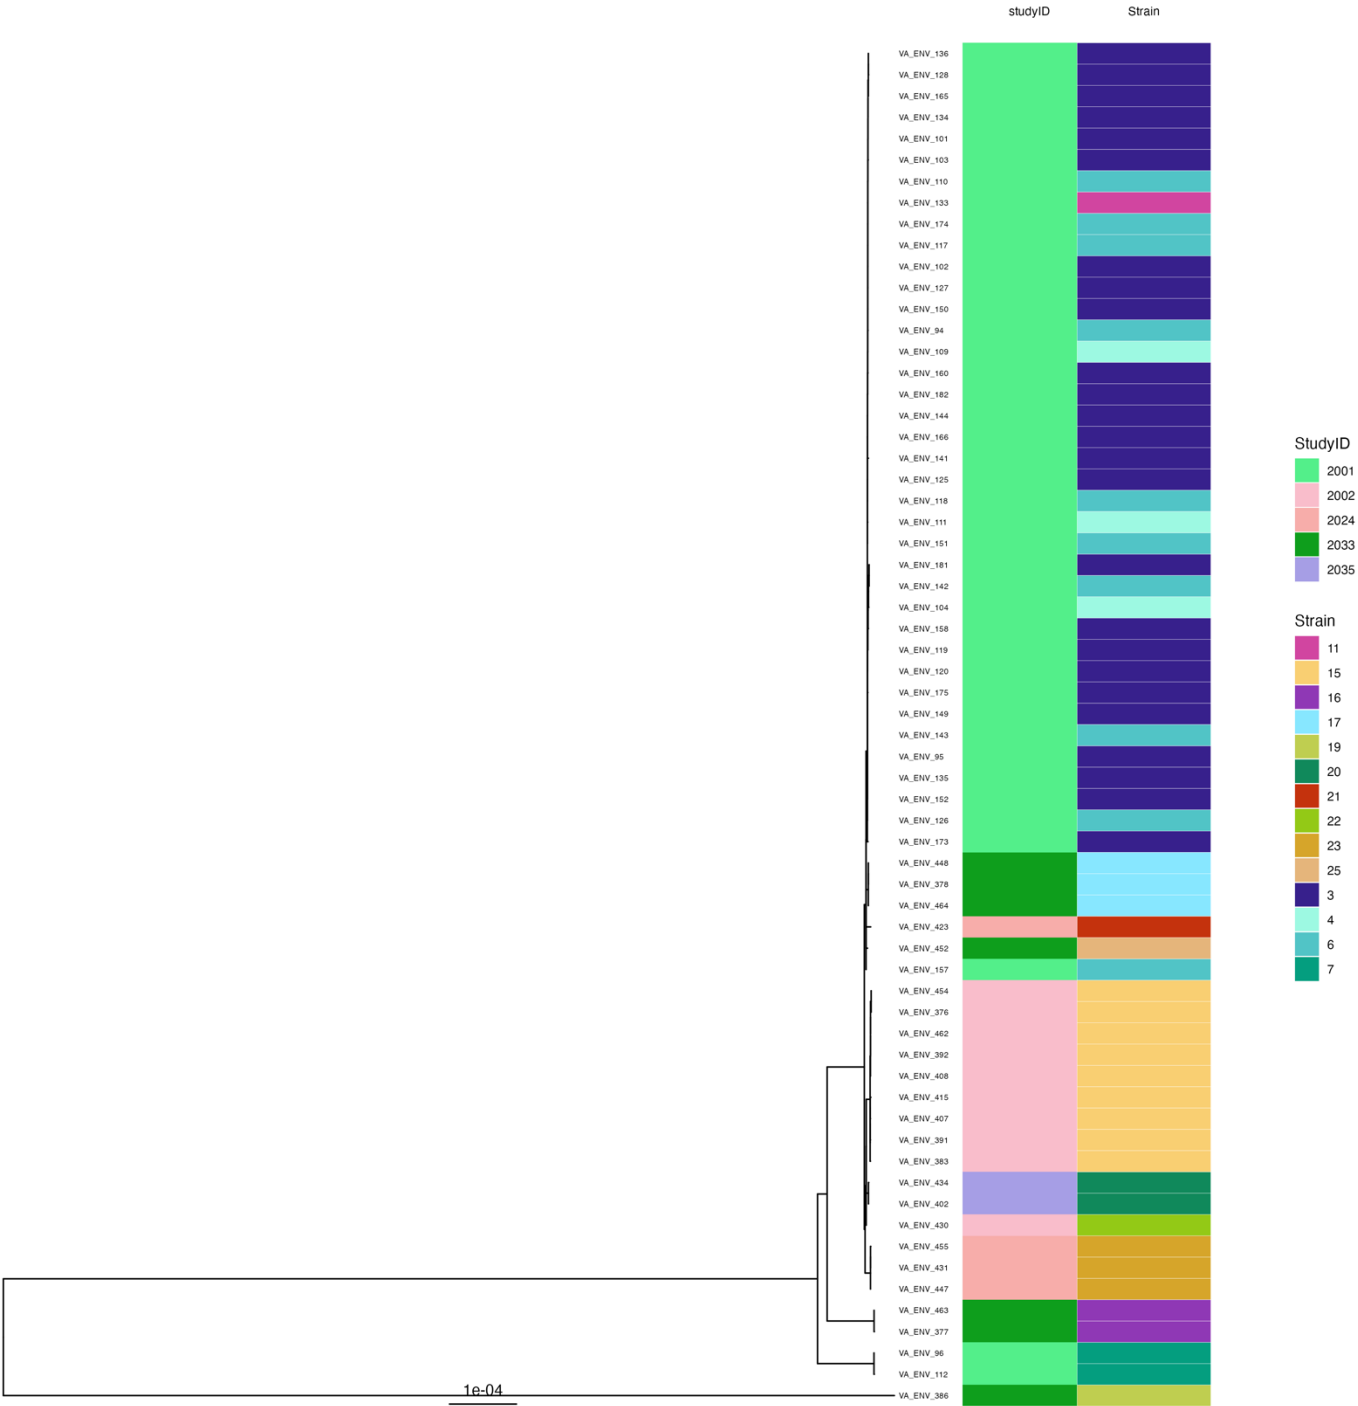

d.

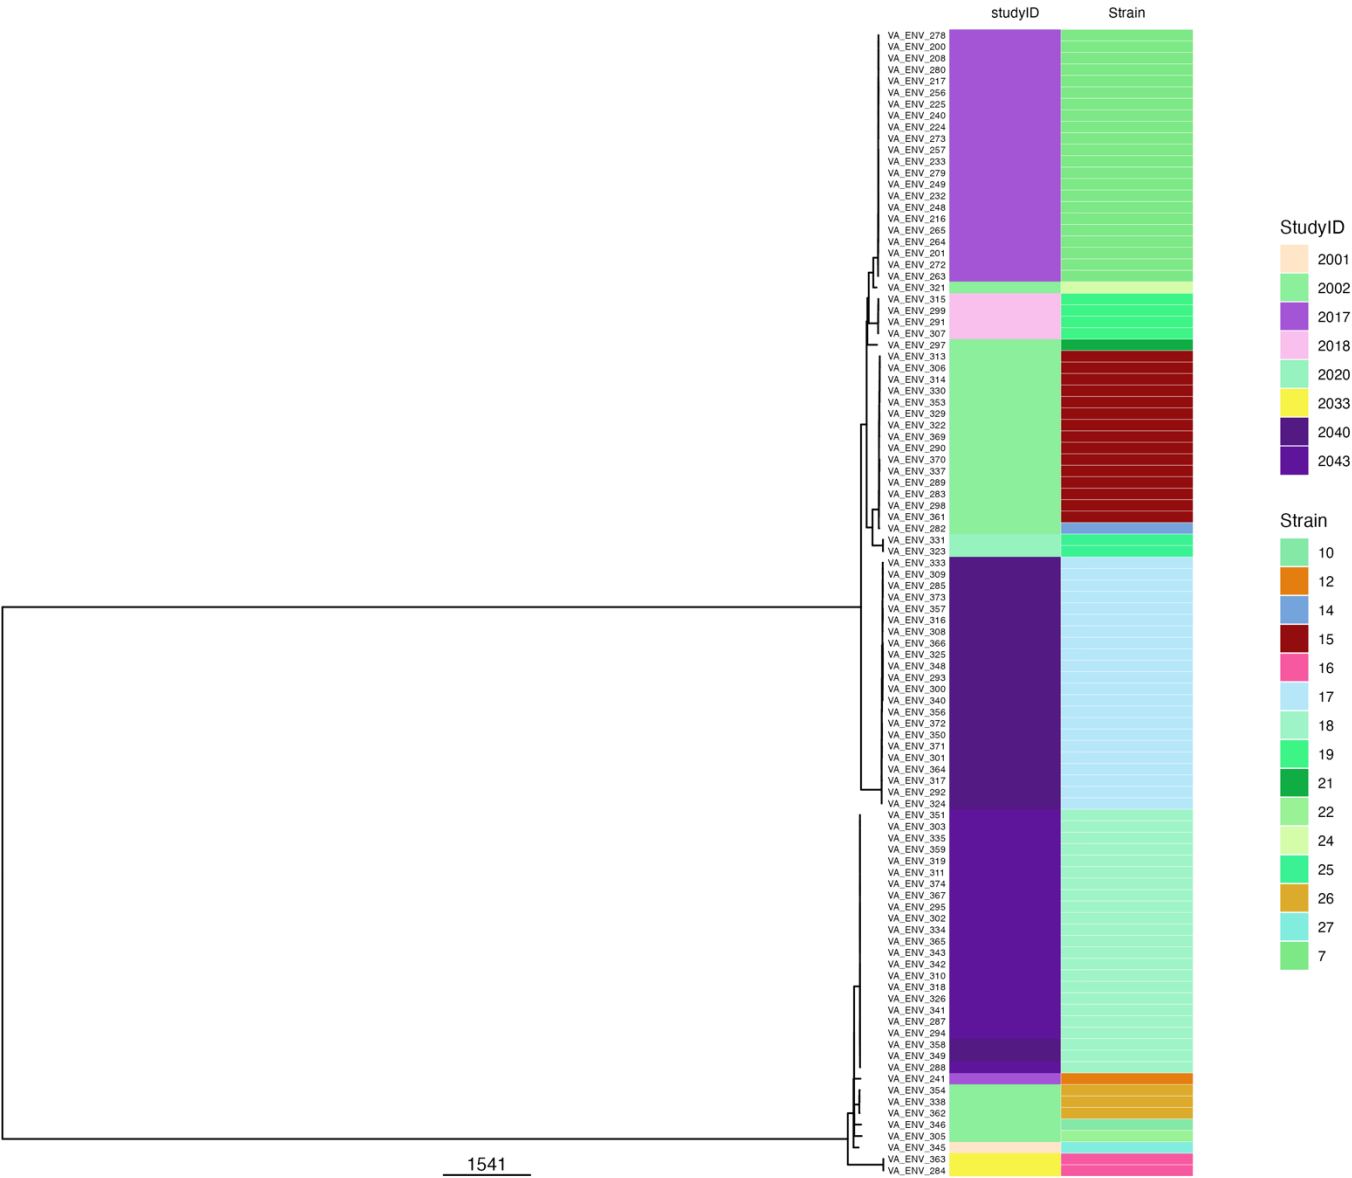

e.

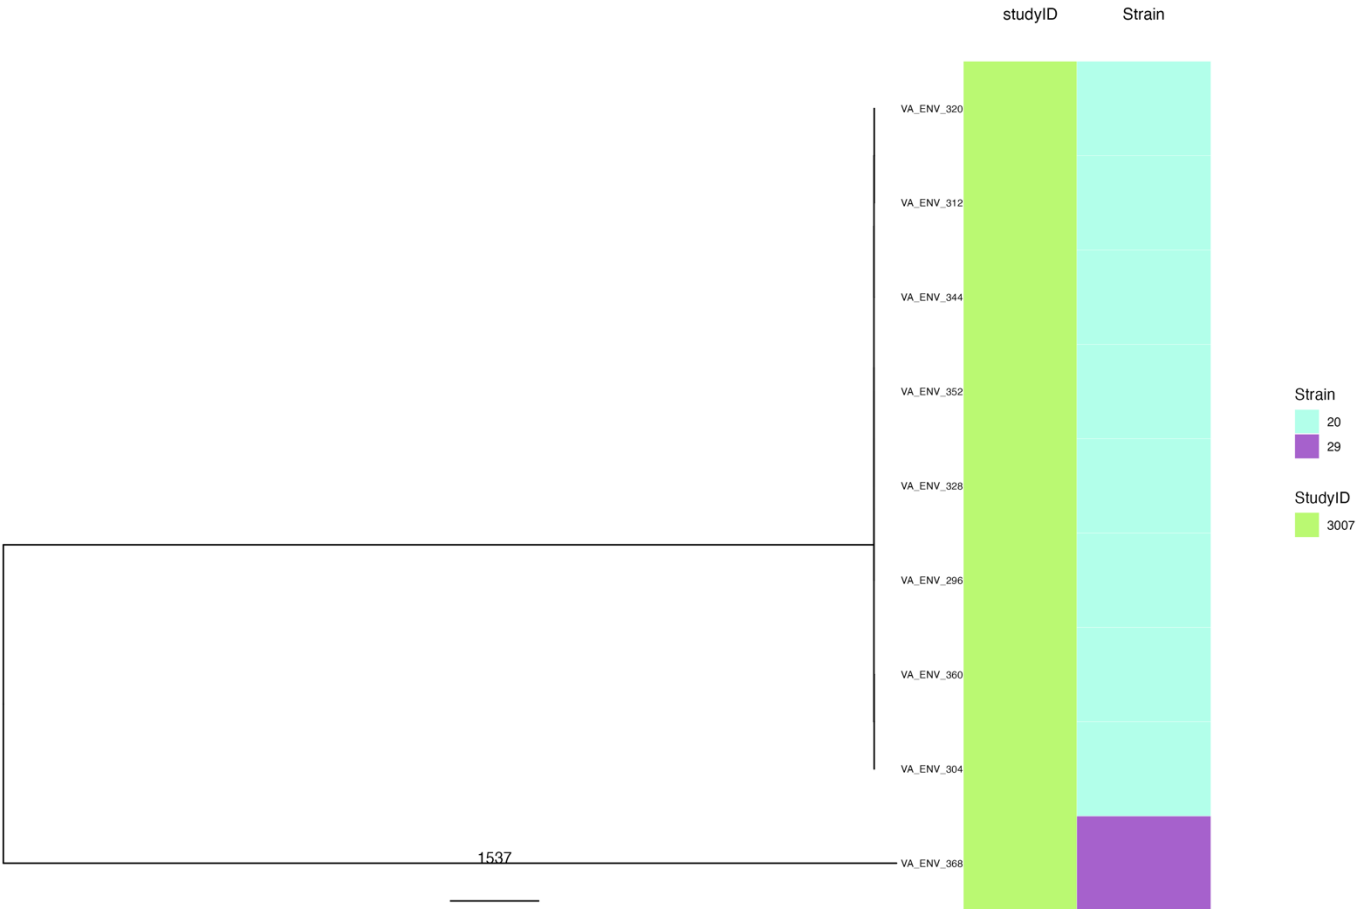

f.

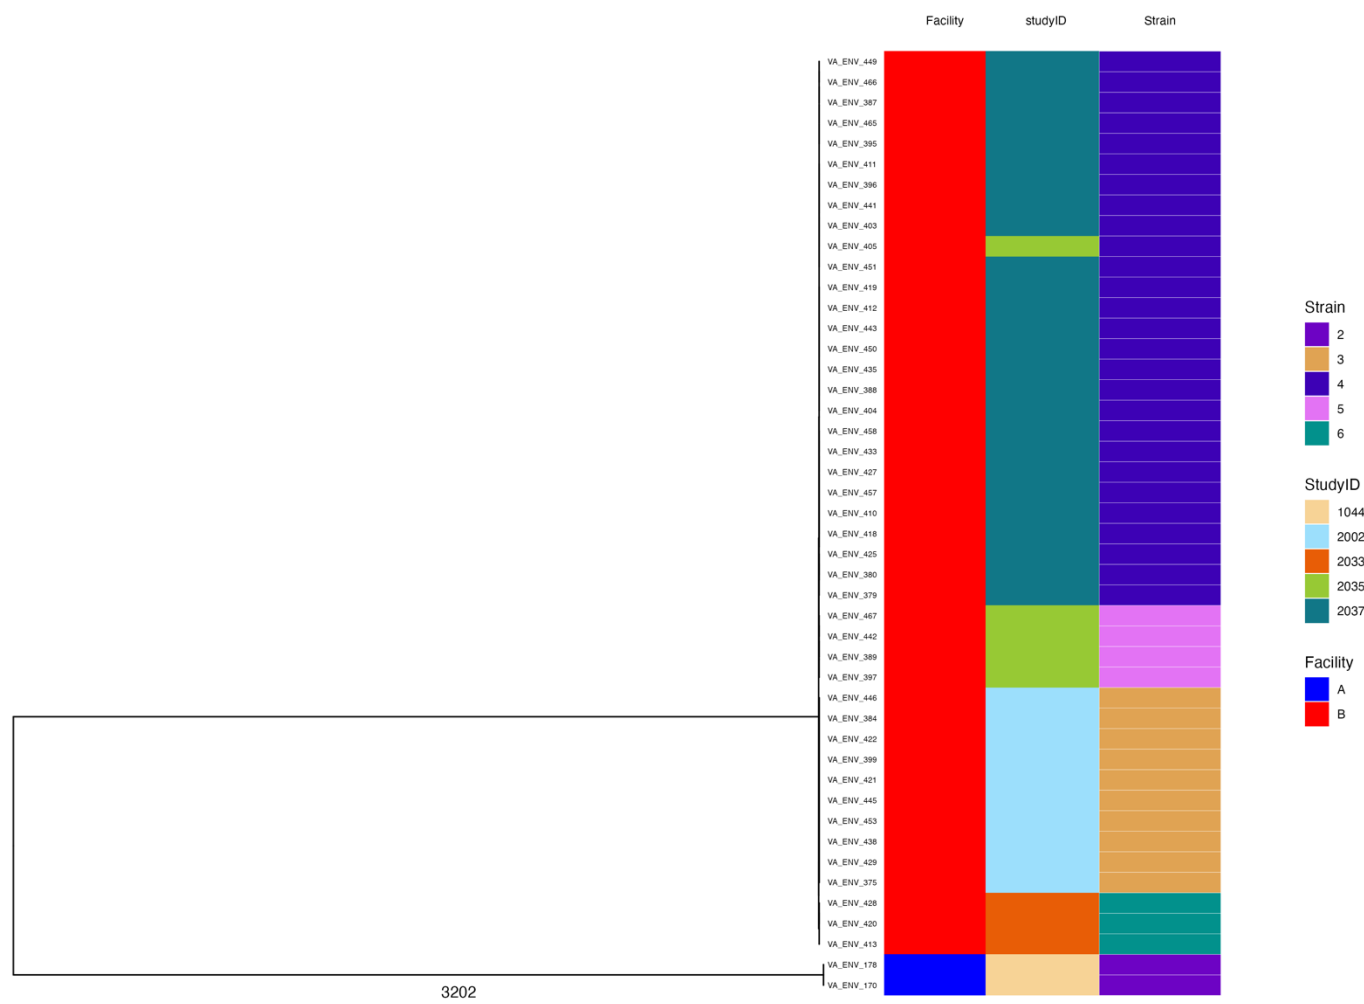

**Supplementary Figure 7.** Whole-genome maximum likelihood phylogenies of multidrug-resistant isolates from facilities A, B, and C were created using IQtree. The scale bar indicates substitutions per site. Adjacent heatmaps indicate the study ID of the participant from which an isolate was associated with (e.g. on the participant, in their room, during their visit) and the assigned strain groups using species-specific SNF cutoffs (see main text Methods and Supplemental Figure 6, 10 SNFs for VRE and 20 SNVs for MRSA). **a.** Facility A *E. faecium* phylogeny. **b.** Facility A *S. aureus* phylogeny. **c.** Facility B *E. faecium* phylogeny. **d.** Facility B *S. aureus* phylogeny. **e.** Facility C *S. aureus* phylogeny. **f.** All *E. faecalis* phylogeny
